# Supplementary material
Source: publisher site journal article supplement (https://www.dovepress.com/article/490303)
Supplement: Supplementary file 1 [file get_supplementary_file.php]

Design, synthesis and evaluation of novel cyclopropanesulfonamide derivatives for the treatment of EGFRC797S mutation in non-small cell lung cancer

Mengxuan Wanga,1, Zhenhong Xiaa,1,Wenyan Niea, Chunlong Wanga, Haoran Niea, Shuai Zhanga, Jiaqi Qiua, Yang Yanga, Cuifang Yaoa, Ling Xub*, and Baijiao Ana*.

*a Shandong Technology Innovation Center of Molecular Targeting and Intelligent Diagnosis and Treatment, Binzhou Medical University, Yantai, Shandong*

*b Department of Respiratory Critical Care Medicine, Binzhou Medical University Hospital，Yantai, Shandong, 264003, PR China*

*Corresponding author*

Ling Xu，1659996191@qq.com

Baijiao An，anbj3@bzmc.edu.cn

**Supplementary Contents**

**Table S1 and Table S****2 P2-P3**

**Figure S1 Original Western blot P4**

**Figure S2 and Figure S3 Protein statistical analysis diagram P5-P6**

**Supplementary Information NMR** **and HPLC spectra of target compounds P7-P35**

**Table S1.Compounds inhibiting cancer cell lines harboring the EGFR19del construct.**

|  | IC50(μM) | |
| --- | --- | --- |
| PC-9 | A549 |
| 5a | 0.158±0.020 | 0.693±0.116 |
| 5b | 0.011±0.003 | 0.582±0.025 |
| 5c | 0.048±0.003 | 0.745±0.007 |
| 5d | 0.016±0.001 | 0.845±0.002 |
| 5e | 0.011±0.006 | 0.823±0.309 |
| 5f | 0.035±0.002 | 1.037±0.026 |
| 5g | 0.016±0.001 | 0.387±0.155 |
| 5h | 0.151±0.001 | 3.116±0.385 |
| 17b | 0.080±0.005 | 0.428±0.348 |
| 17a | 0.095±0.004 | 0.690±0.415 |
| Osimertinib | 0.011±0.003 | 3.956±1.986 |

**Table S2 Antiproliferative activity of 5d against three human normal cellsa.**

| Compd | **5d** | Selectivity ratio*b* | Brigatinib | Selectivity ratio*b* |
| --- | --- | --- | --- | --- |
| LO2 | 7.55±0.15 | 411.22 | 2.203±0.02 | 4.156 |
| HK2 | 7.583±0.09 | 412.02 | 3.845±0.09 | 7.254 |
| 293A | 4.030±0.01 | 219.49 | 3.532±0.014 | 6.66 |
| Baf3-EGFRL858R/T790M/C797S | 0.01836±0.0065 | / | 0.426±0.018 | / |

aData are presented as the mean ± SE from the dose−response cures of at least three independent experiments. bSelectivity ratio = (IC50 human normal cells)/(IC50 Baf3-EGFRL858R/T790M/C797S).


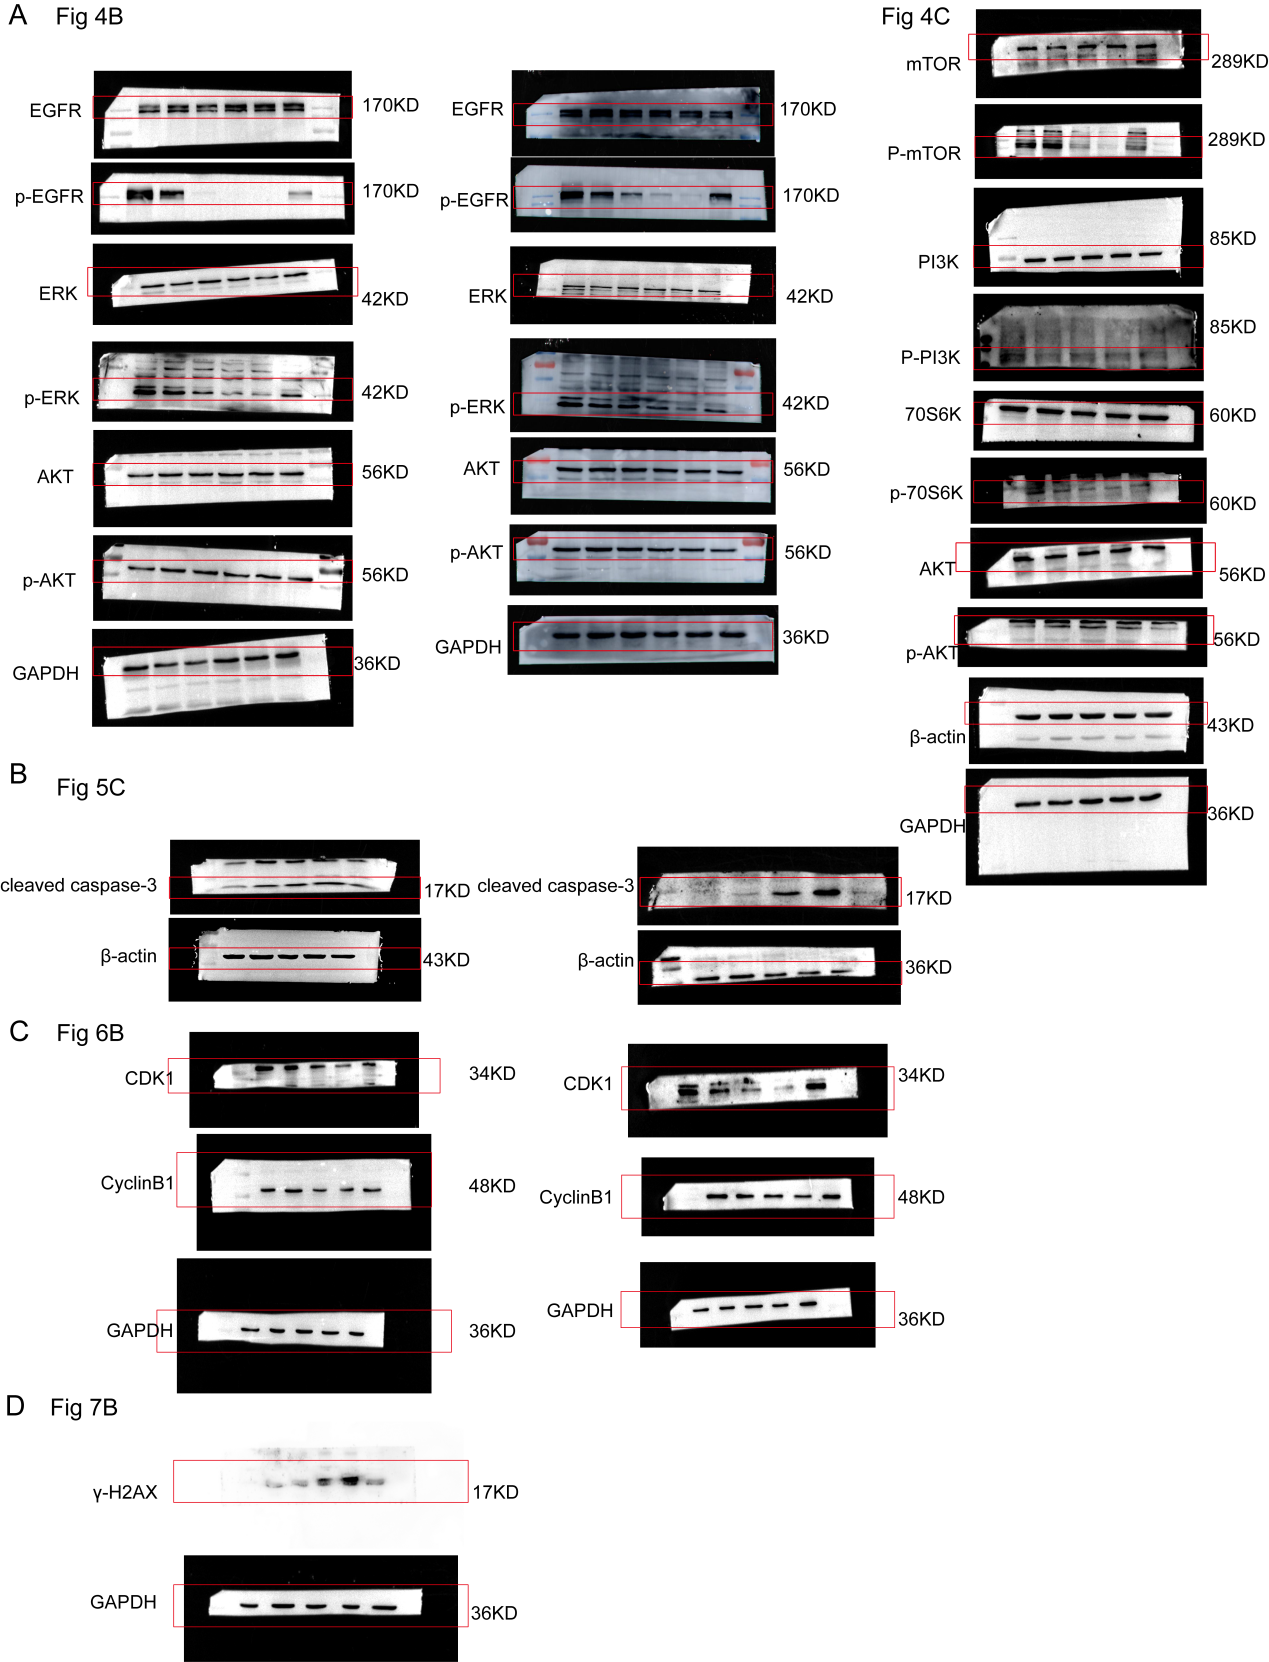


Figure S1. Original Western blot.

**Protein statistical analysis diagram**


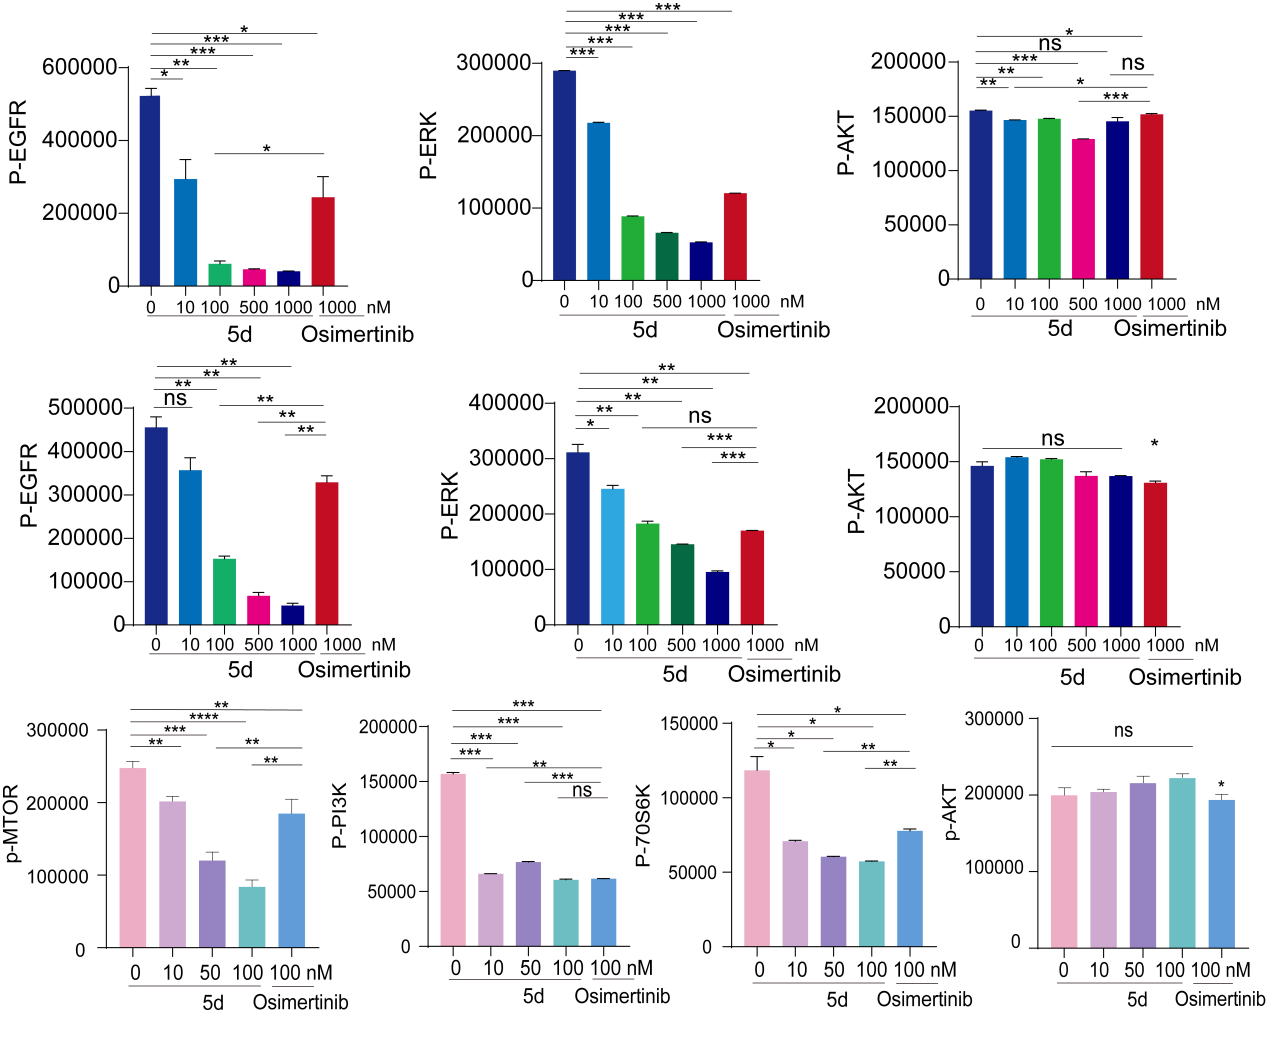


Figure S2. Compound 5d inhibited cancer progression by inhibiting the EGFR and m-TOR signaling pathways.


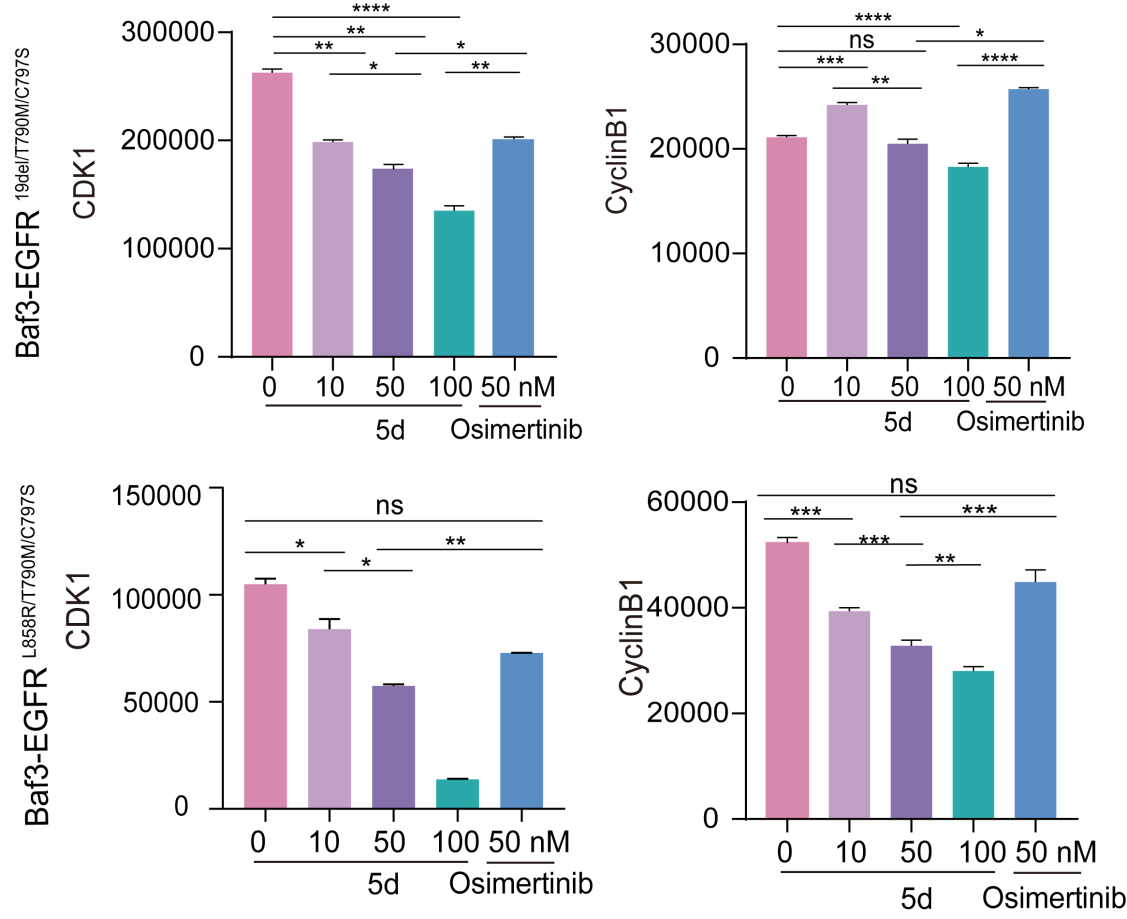


Figure S3. Compound **5d** blocks the cell cycle.

**Supplementary Information NMR，HRMS and HPLC spectra of target compounds**

**Intermediate 4**

1H NMR for N-(2-((2,5-dichloropyrimidin-4-yl)amino)phenyl)methanesulfonamide: 1H NMR (400 MHz, Chloroform-d) δ 8.38 (s, 1H), 8.23 (s, 1H), 8.04 (d, J = 9.1 Hz, 1H), 7.47 – 7.34 (m, 2H), 3.06 (s, 3H).

N-(2-((2,5-dichloropyrimidin-4-yl)amino)phenyl)ethanesulfonamide: 1H NMR (400 MHz, Chloroform-*d*) δ 8.19 (s, 1H), 7.37 (d, *J* = 7.8 Hz, 2H), 7.21 (ddt, *J* = 10.5, 7.4, 2.4 Hz, 2H), 3.12 (q, *J* = 7.4 Hz, 2H), 1.41 (t, *J* = 7.4 Hz, 3H).

1H NMR for N-(2-((2,5-dichloropyrimidin-4-yl)amino)phenyl)cyclopropanesulfonamide: 1H NMR (400 MHz, Chloroform-*d*) δ 8.00 (s, 1H), 7.48 – 7.29 (m, 3H), 7.22 – 7.18 (m, 1H), 1.33 (s, 1H), 1.14 – 1.08 (m, 2H), 1.03 – 0.94 (m, 2H).

**8b**

1H NMR (400 MHz, Chloroform-*d*) δ 6.62 (d, *J* = 8.3 Hz, 1H), 6.51 (d, *J* = 2.3 Hz, 1H), 6.40 (dd, *J* = 8.3, 2.4 Hz, 1H), 3.82 (s, 3H), 3.40 (s, 2H), 3.16 – 3.01 (m, 4H), 2.69 – 2.53 (m, 4H), 2.34 (s, 3H).

**8c**

1H NMR (400 MHz, Chloroform-*d*) δ 6.87 (d, *J* = 8.3 Hz, 1H), 6.52 (d, *J* = 2.8 Hz, 1H), 6.47 (dd, *J* = 8.3, 2.8 Hz, 1H), 3.43 (s, 2H), 2.84 (t, *J* = 4.8 Hz, 4H), 2.54 (s, 4H), 2.33 (s, 3H), 2.22 (s, 3H).

**Intermediate 11**

1H NMR (400 MHz, Chloroform-*d*) δ 8.72 (d, *J* = 5.8 Hz, 2H), 7.78 (s, 1H), 7.29 (d, *J* = 5.9 Hz, 2H), 6.96 (s, 1H), 3.96 (s, 3H), 2.25 (s, 3H).

**Intermediate 12**

1H NMR (400 MHz, Chloroform-*d*) δ 7.69 (s, 1H), 6.82 (s, 1H), 5.68 – 5.55 (m, 1H), 3.91 (s, 3H), 3.10 (s, 2H), 2.67 (t, *J* = 5.6 Hz, 2H), 2.43 (s, 3H), 2.41 (s, 2H), 2.26 (s, 3H).

**Intermediate 13**

1H NMR (400 MHz, Chloroform-*d*) δ 6.47 (s, 1H), 6.42 (s, 1H), 5.42 (dq, *J* = 3.7, 1.8 Hz, 1H), 3.69 (s, 3H), 3.04 (d, *J* = 3.3 Hz, 2H), 2.61 (t, *J* = 5.7 Hz, 2H), 2.36 (s, 3H), 2.34 (s, 2H), 2.07 (s, 3H).

**Intermediate 14**

1H NMR (400 MHz, Chloroform-*d*) δ 7.78 (s, 1H), 7.09 (s, 1H), 3.94 (s, 3H), 2.36 (s, 3H).

**Intermediate 16**

1H NMR (400 MHz, Chloroform-*d*) δ 11.55 (s, 1H), 8.67 (dd, *J* = 8.6, 4.5 Hz, 1H), 8.22 (s, 1H), 7.59 (t, *J* = 8.0 Hz, 1H), 7.29 (dd, *J* = 13.7, 7.9 Hz, 1H), 7.18 (t, *J* = 6.9 Hz, 1H), 1.85 (d, *J* = 13.2 Hz, 6H).

**N-(2-((5-chloro-2-((2-methoxy-4-(4-methylpiperazin-1-yl)phenyl)amino)pyrimidin-4-yl)amino)phenyl)cyclopropanesulfonamide (5a)**

White solid. 1H NMR (400 MHz, DMSO-d6) δ 8.47 (s, 1H), 8.08 (s, 2H), 8.03 (d, J=8.1Hz,1H), 7.91 (s, 1H), 7.44 (d, J = 8.7 Hz, 1H), 7.37 (d, J = 7.8, 1H), 7.22 (t, J=7.4 Hz,1H), 7.14 (t, J = 8.3 Hz, 1H), 6.60 (d, J=2.5 Hz,1H), 6.39-6.36 (m, 1H) 3.76 (s, 3H), 3.16-3.06 (m, 4H), 2.57-2.53 (m, 1H), 2.48-2.47 (m, 4H), 2.24 (s, 3H), 0.93-0.82 (m, 4H). 13C NMR (126 MHz, DMSO) δ 159.19, 155.57, 154.85, 152.25, 149.04, 134.85, 129.95, 127.09, 125.93, 124.56, 124.17, 123.50, 120.67, 107.08, 103.96, 100.43, 55.92, 55.16, 49.21, 46.24, 29.72, 5.56. HRMS (ESI+ ) calcd for C25H30ClN7O3S [M + H]+ 544.1898; found, 544.1931. HPLC purity: 97.16%.

**N-(2-((5-chloro-2-((3-methyl-4-(4-methylpiperazin-1-yl)phenyl)amino)pyrimidin-4-yl)amino)phenyl)cyclopropanesulfonamide (5b)**

White solid. 1H NMR (500 MHz, DMSO-*d*6) δ 9.17 (s, 1H), 8.54 (s, 1H), 8.15 (s, 1H), 8.07 – 8.03 (m, 1H), 7.46 – 7.36 (m, 2H), 7.29 (q, *J* = 7.4 Hz, 2H), 7.21 (t, *J* = 7.6 Hz, 1H), 6.86 (d, *J* = 8.7 Hz, 1H), 2.78-2.76 (m, 4H), 2. 47 – 2.42 (m, 4H), 2.24 (s, 3H), 2.12 (s, 3H), 0.89 – 0.84 (m, 4H). 13C NMR (126 MHz, DMSO) δ 158.28, 156.00, 155.02, 145.75, 136.01, 135.09, 132.28, 129.44, 128.36, 127.37, 125.33, 125.03, 122.13, 119.13, 118.10, 104.17, 55.31, 52.49, 51.48, 45.74, 29.59, 18.10, 5.59. HRMS (ESI+ ) calcd for C25H31ClN7O2S [M + H]+ 528.1948; found, 528.1959. HPLC purity: 99.55%.

**N-(2-((5-chloro-2-((2-methoxy-5-methyl-4-(1-methylpiperidin-4-yl)phenyl)amino)pyrimidin-4-yl)amino)phenyl)cyclopropanesulfonamide (5c)**

White solid. 1H NMR (500 MHz, Chloroform-*d*) δ 8.06 (s, 1H), 7.94 (s, 1H), 7.89 (d, *J* = 8.0 Hz, 1H), 7.79 (s, 1H), 7.52 (d, *J* = 7.9 Hz, 1H), 7.46 (s, 1H), 7.31 (t, *J* = 8.3 Hz, 1H), 7.21 (t, *J* = 7.7 Hz, 1H), 6.68 (s, 1H), 3.79 (s, 3H), 3.04 (d, *J* = 11.2 Hz, 2H), 2.61 – 2.56 (m, 1H), 2.47 – 2.42 (m, 1H), 2.38 (s, 3H), 2.15 – 2.10 (m, 2H), 1.99 (s, 3H), 1.82 – 1.73 (m, 2H), 1.67 (d, *J* = 12.4 Hz, 2H), 1.09 –1.05 (m, 2H), 0.93 – 0.82 (m, 2H). 13C NMR (126 MHz, CDCl3) δ 157.69, 156.19, 154.76, 146.44, 136.99, 134.54, 129.56, 128.04, 127.74, 126.80, 126.33, 125.56, 125.35, 120.32, 107.53, 104.88, 56.29, 55.77, 45.99, 37.05, 32.21, 29.73, 18.70, 5.68. HRMS (ESI+ ) calcd for C27H34ClN6O3S [M + H]+ 557.2102; found, 557.2104. HPLC purity: 99.55%.

**N-(2-((5-chloro-2-((4-(1-methylpiperidin-4-yl)phenyl)amino)pyrimidin-4-yl)amino)phenyl)cyclopropanesulfonamide (5d)**

White solid. 1H NMR (400 MHz, Chloroform-*d*) δ 9.13 (s, 1H), 8.51 (s, 1H), 8.13 (s, 1H), 8.08 (t, *J* = 8.3 Hz, 1H), 7.45-7.37(m, 3H), 7.36-7.30 (m, 1H), 7.21 (t, *J* = 7.7 Hz, 1H), 7.23 (d, *J* = 7.7 Hz, 1H), 6.78 (dd, *J* = 9.2, 2.1 Hz, 2H), 3.08 –2.94 (m, 4H), 2.57-2.52 (m, 1H), 2.49 –2.47 (m, 4H), 2.24 (s, 3H), 0.90 –0.83 (m, 4H). 13C NMR (101 MHz, DMSO) δ 158.34, 158.25, 155.93, 155.02, 145.46, 135.17, 133.53, 128.53, 127.65, 125.41, 125.04, 120.91, 116.68, 104.03, 53.56, 47.62, 45.65, 43.66, 5.64. HRMS (ESI+ ) calcd for C24H29ClN7O2S [M + H]+ 514.1792; found, 514.2170. HPLC purity: 95.87%.

**N-(2-((5-chloro-2-((4-(4-methylpiperazin-1-yl)phenyl)amino)pyrimidin-4-yl)amino)phenyl)methanesulfonamide (5e)**

White solid. 1H NMR (400 MHz, DMSO-*d*6) δ 9.17 (d, *J* = 2.5 Hz, 0H), 8.51 (s, 0H), 8.14 (s, 1H), 8.02 (t, *J* = 8.7 Hz, 1H), 7.47 – 7.32 (m, 4H), 7.25 (t, *J* = 7.6 Hz, 1H), 6.82 (dd, *J* = 9.1, 2.4 Hz, 2H), 3.22 – 3.20 (m, *J*, 4H), 3.05 – 3.02 (m, 4H), 2.96 (s, 3H), 2.64 (s, 3H). 13C NMR (101 MHz, DMSO) δ 158.25, 156.11, 155.00, 145.49, 134.93, 133.50, 129.69, 129.50, 127.52, 126.00, 125.50, 120.86, 116.63, 104.10, 53.66, 47.74, 45.65, 43.81. HRMS (ESI+) calcd for C22H27ClN7O2S [M + H]+ 488.1635; found, 488.1636. HPLC purity: 96.19%.

**N-(2-((5-chloro-2-((2-methoxy-5-methyl-4-(4-methylpiperazin-1-yl)phenyl)amino)pyrimidin-4-yl)amino)phenyl)methanesulfonamide** **(5f)**

White solid. 1H NMR (500 MHz, Chloroform-*d*) δ 8.05 (s, 1H), 8.02 – 7.90 (m, 1H), 7.85 (t, *J* = 7.7 Hz, 1H), 7.74 (s, 1H), 7.49 (d, *J* = 7.8 Hz, 1H), 7.45 (s, 1H), 7.29 (d, *J* = 7.5 Hz, 1H), 7.23 (d, *J* = 7.7 Hz, 1H), 6.65 (s, 1H), 3.79 (s, 3H), 3.09 –3.07 (m, 2H), 2.92 (s, 3H), 2.60 –2.55 (m, 1H), 2.42 (s, 3H), 2.20 – 2.16 (m, 2H), 1.93 (s, 3H), 1.82 – 1.75 (m, 2H), 1.65-1.64 (m, 2H). 13C NMR (126 MHz, CDCl3) δ 157.66, 156.32, 154.76, 146.43, 136.60, 134.10, 130.55, 127.31, 126.74, 126.59, 126.39, 125.99, 125.86, 120.26, 107.47, 104.89, 56.11, 55.78, 45.66, 39.21, 36.83, 31.83, 18.66. HRMS (ESI+ ) calcd for C24H30ClN7O3S [M + H]+ 531.1945; found, 531.1948. HPLC purity: 95.48%.

**N-(2-((5-chloro-2-((3-methyl-4-(4-methylpiperazin-1-yl)phenyl)amino)pyrimidin-4-yl)amino)phenyl)ethanesulfonamide (5g)**

White solid. 1H NMR (500 MHz, DMSO-*d*6) δ 9.17 (s, 1H), 8.57 (s, 1H), 8.14 (s, 1H), 7.91 (d, *J* = 6.8 Hz, 1H), 7.41 – 7.32 (m, 2H), 7.28 (t, *J* = 7.6 Hz, 1H), 7.23 (t, *J* = 7.3 Hz, 2H), 6.83 (d, *J* = 8.6 Hz, 1H), 3.00 (q, *J* = 7.2 Hz, 2H), 2.79-2.73 (m, 4H), 2.51-2.49 (m, 4H), 2.25 (s, 3H), 2.09 (s, 3H), 1.16 (t, *J* = 7.3 Hz, 3H). 13C NMR (126 MHz, DMSO) δ 158.30, 156.35, 155.00, 145.87, 135.96, 134.40, 132.22, 130.55, 126.97, 126.91, 126.27, 125.69, 122.02, 119.07, 117.99, 104.16, 55.60, 51.86, 46.13, 45.58, 18.09, 8.34. HRMS (ESI+ ) calcd for C24H30ClN7O2S [M + H]+ 516.1948; found, 516.1947. HPLC purity: 98.59%.

**N-(2-((5-chloro-2-((2-methoxy-4-(4-methylpiperazin-1-yl)phenyl)amino)pyrimidin-4-yl)amino)phenyl)ethanesulfonamide (5h)**

White solid. 1H NMR (500 MHz, DMSO-*d*6) δ 8.66 (s, 1H), 8.07 (s, 1H), 7.97 (s, 1H), 7.86 (s, 1H), 7.44 (d, *J* = 8.6 Hz, 1H), 7.35 – 7.28 (m, 1H), 7.10 (dd, *J* = 5.8, 3.5 Hz, 2H), 6.60 (d, *J* = 2.3 Hz, 1H), 6.36 (dd, *J* = 8.7, 2.0 Hz, 1H), 3.76 (s, 3H), 3.14 – 3.07 (m, 4H), 2.97 (q, *J* = 7.3 Hz, 2H), 2.49 – 2.43 (m, 4H), 2.23 (s, 3H), 1.19 (t, *J* = 7.3 Hz, 3H). 13C NMR (126 MHz, DMSO) δ 159.10, 155.84, 154.83, 152.01, 148.87, 134.37, 125.99, 125.53, 124.70, 124.28, 124.19, 120.75, 107.08, 100.43, 55.93, 55.13, 49.20, 46.21, 46.05, 45.58, 10.43, 8.55. HRMS (ESI+ ) calcd for C24H30ClN7O3S [M + H]+ 531.1898; found, 532.1919. HPLC purity: 97.23%.

**(2-((5-chloro-2-((2-methoxy-5-methyl-4-(1-methylpiperidin-4-yl)phenyl)amino)pyrimidin-4-yl)amino)phenyl)dimethylphosphine oxide (17a)**

White solid. 1H NMR (400 MHz, Chloroform-*d*) δ 10.80 (s, 1H), 8.64 (d, *J* = 8.4 Hz, 1H), 8.08 (d, *J* = 22.5 Hz, 2H), 7.50 (t, *J* = 7.8 Hz, 1H), 7.44 (s, 1H), 7.34 – 7.27 (m, 1H), 7.12 (t, *J* = 7.4 Hz, 1H), 6.80 (s, 1H), 3.84 (s, 3H), 3.06 (d, *J* = 10.8 Hz, 2H), 2.77-2.66 (m, 2H), 2.39 (s, 3H), 2.22 (s, 3H), 2.18-2.13 (m, 2H), 1.92 – 1.86 (m, 1H), 1.85 (s, 3H), 1.83 (s, 3H)1.81 – 1.72 (m, 2H). 13C NMR (126 MHz, Chloroform-*d*) δ 157.51, 155.89, 154.93, 146.71, 143.86, 137.26, 132.66, 129.63, 129.55, 126.80, 126.63, 122.73, 122.68, 122.41, 122.31, 120.77, 119.86, 107.73, 106.36, 56.46, 55.76, 46.25, 37.25, 32.61, 18.90, 18.29. HRMS (ESI+ ) calcd for C26H34ClN5O2P [M + H]+ 514.2139; found, 514.2170. HPLC purity: 96.15%.

**(2-((5-chloro-2-((4-(4-methylpiperazin-1-yl)phenyl)amino)pyrimidin-4-yl)amino)phenyl)dimethylphosphine oxide (17b)**

1H NMR (400 MHz, DMSO-*d*6) δ 11.12 (s, 1H), 9.19 (s, 1H), 8.61 (s, 1H), 8.14 (s, 1H), 7.68 – 7.46 (m, 4H), 7.25 – 7.12 (m, 1H), 6.90 (d, *J* = 9.1 Hz, 2H), 3.24 –3.19 (m, 4H), 2.98 –2.89 (s, 4H), 2.56 (s, 3H), 1.80 (s, 3H), 1.76 (s, 3H). 13C NMR (101 MHz, DMSO) δ 158.20, 155.69, 155.23, 145.20, 143.40, 133.74, 132.44, 131.20, 131.10, 122.94, 122.60, 121.43, 116.95, 104.81, 52.89, 46.91, 45.65, 19.00, 18.30. HRMS (ESI+ ) calcd for C23H29ClN6OP [M + H]+ 471.1829; found, 471.1827. HPLC purity: 98.18%.

**H NMR of Compound 5a**


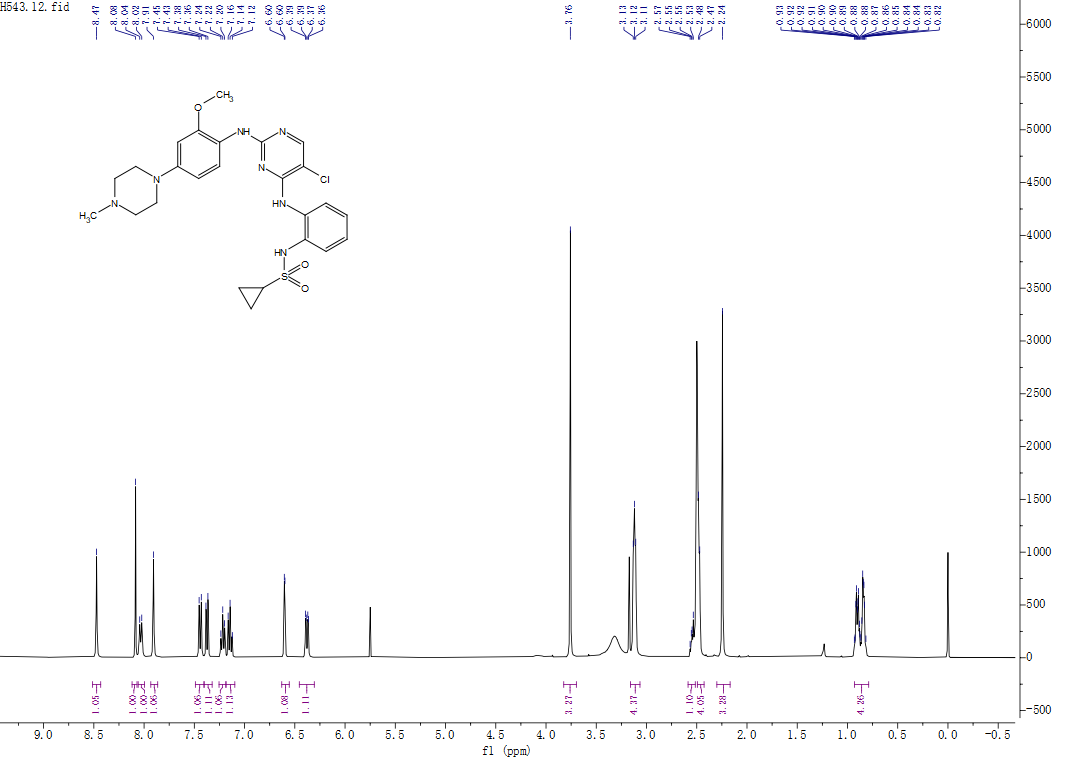


**C NMR of Compound 5a**


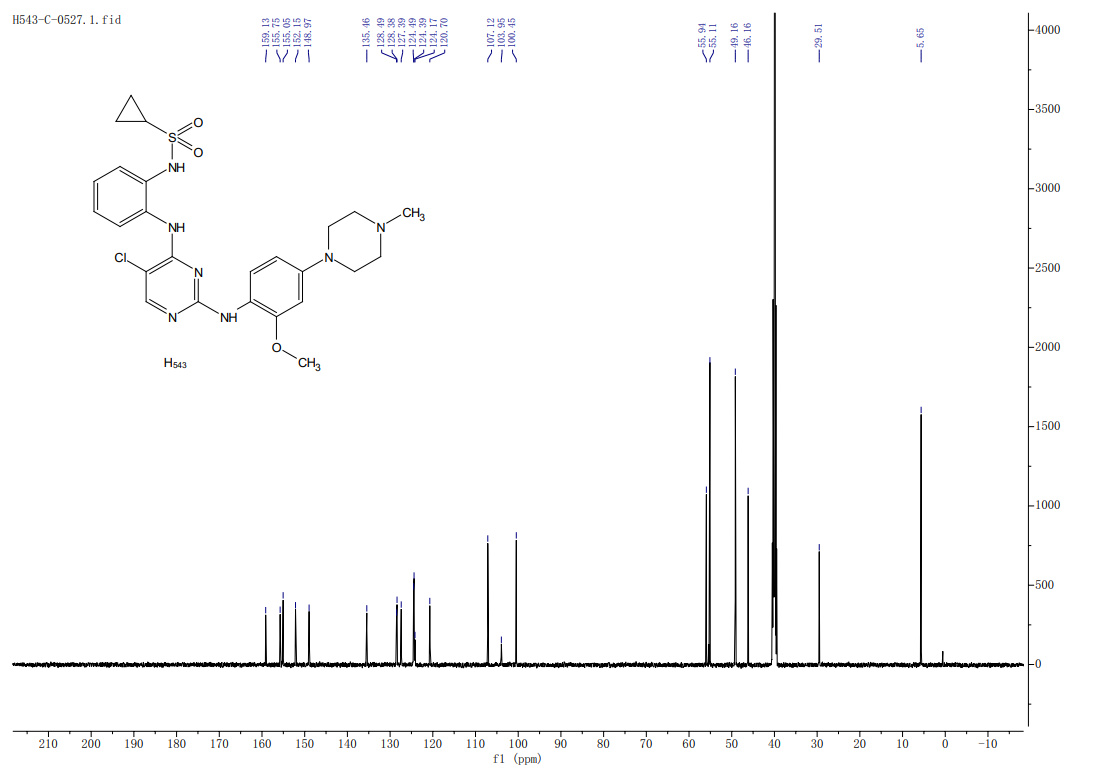


**H NMR of Compound 5b**


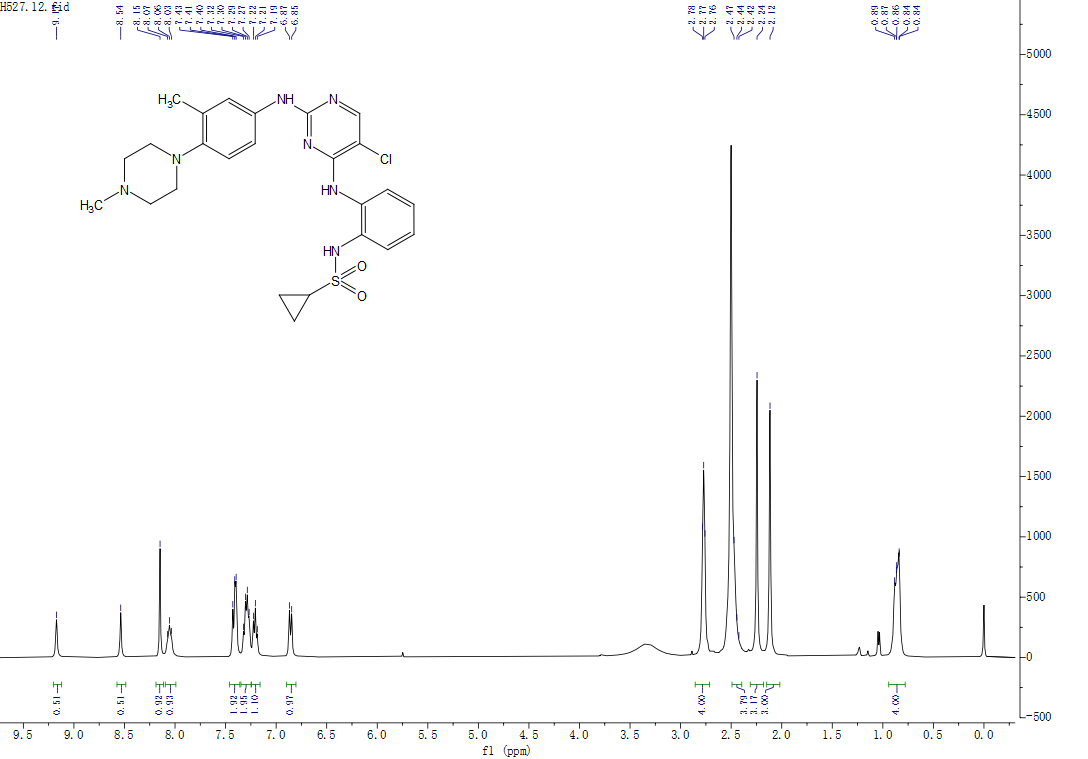


**C NMR of Compound 5b**


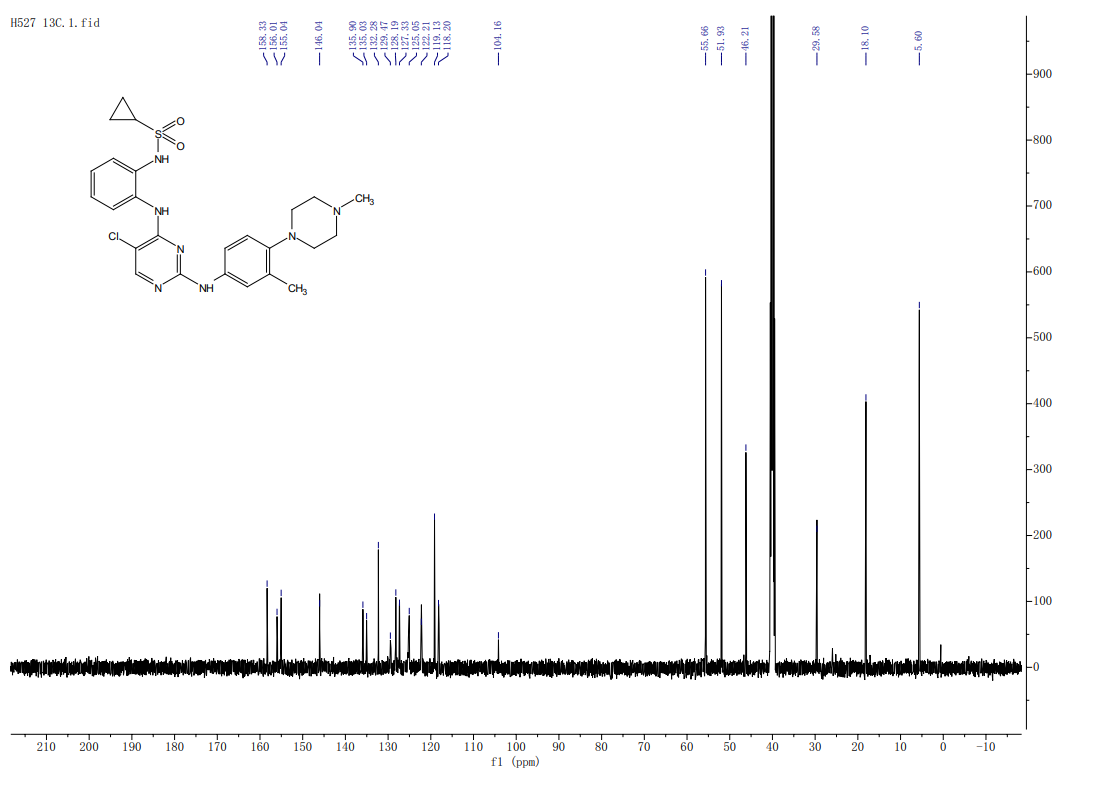


**H NMR of Compound 5C**


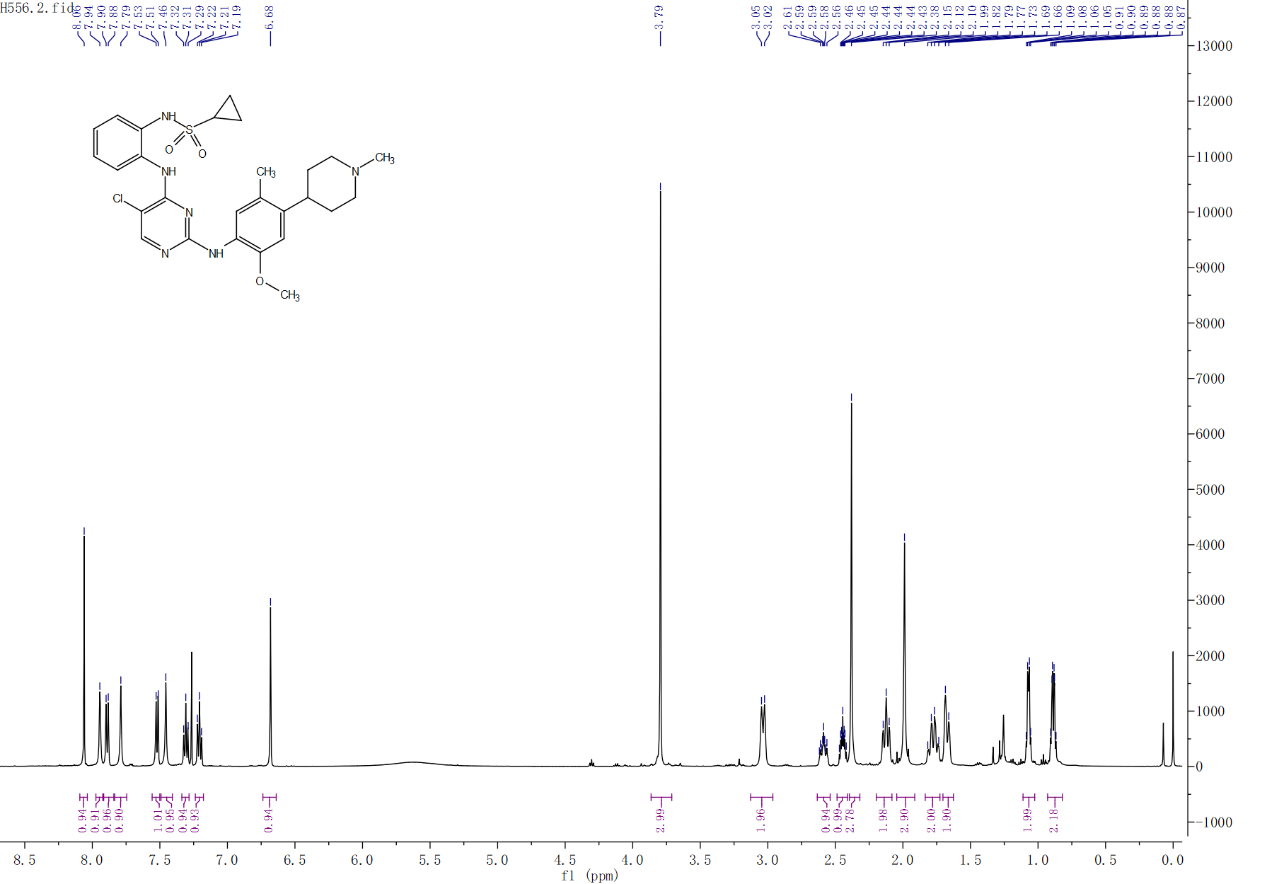


**C NMR of Compound 5C**


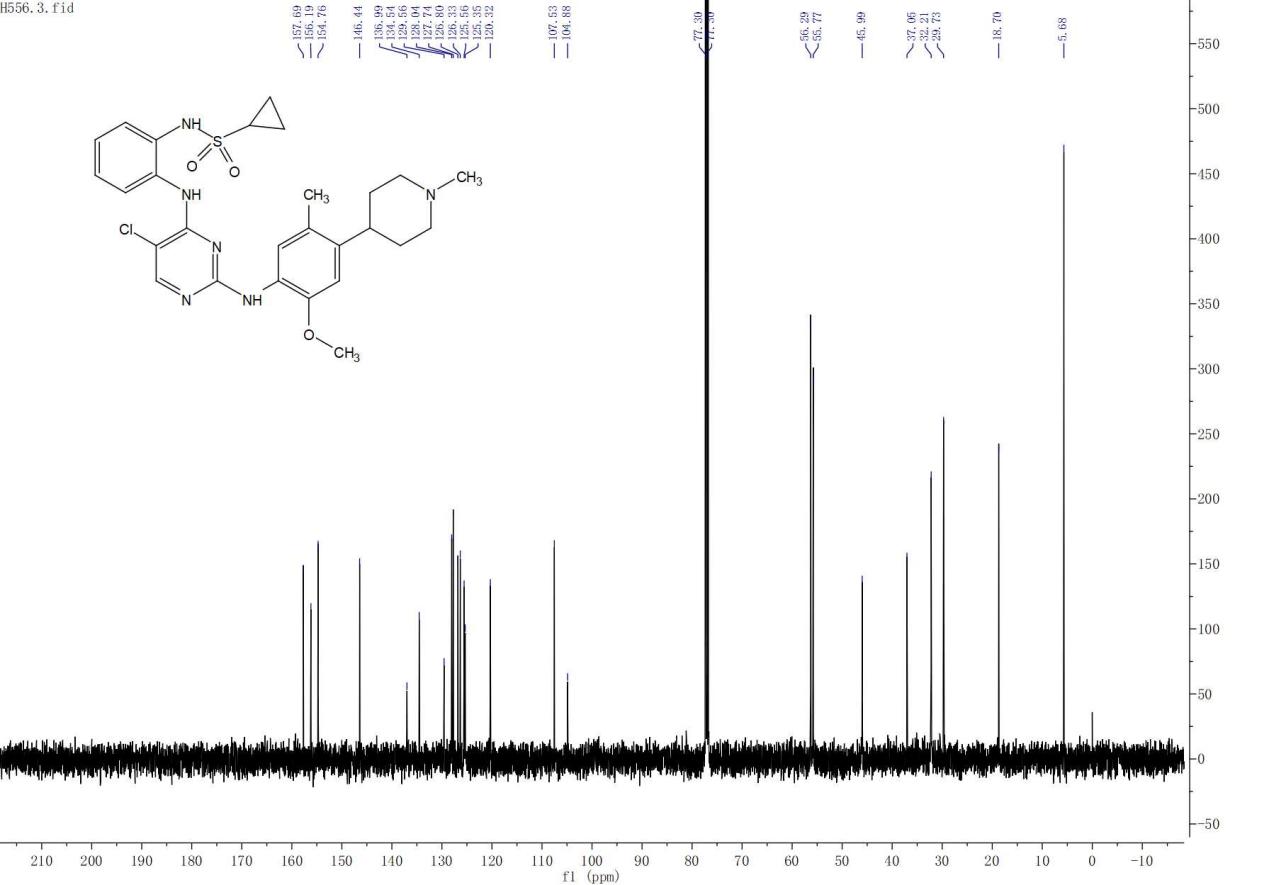


**H NMR of Compound 5d**


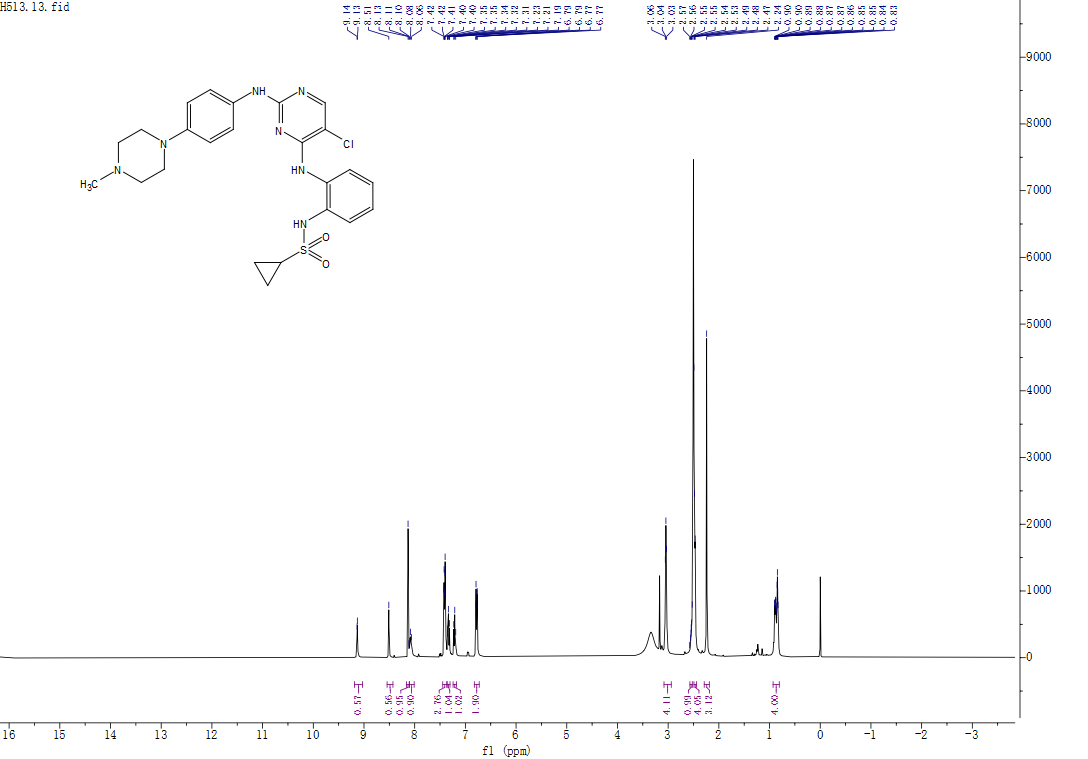


**C NMR of Compound 5d**


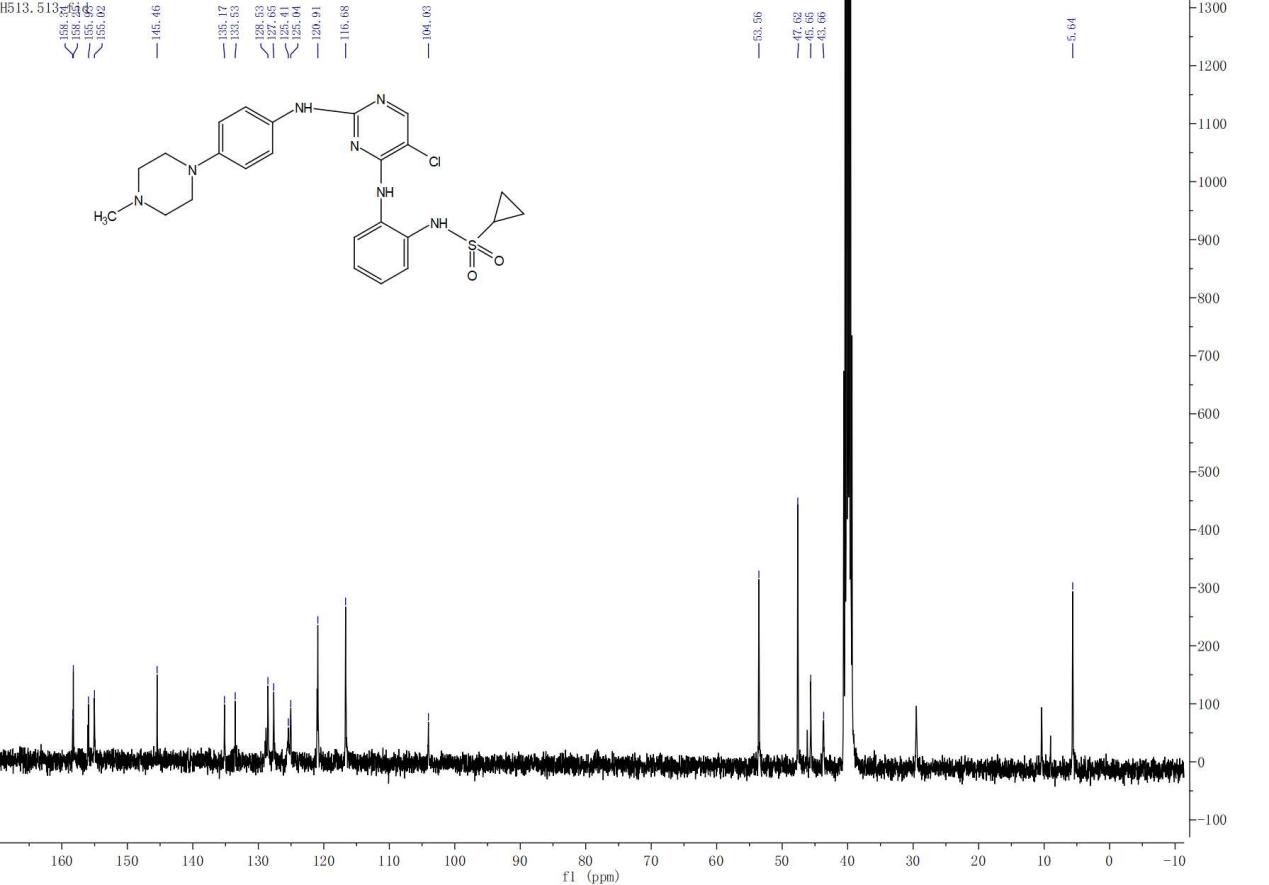


**H NMR of Compound 5e**


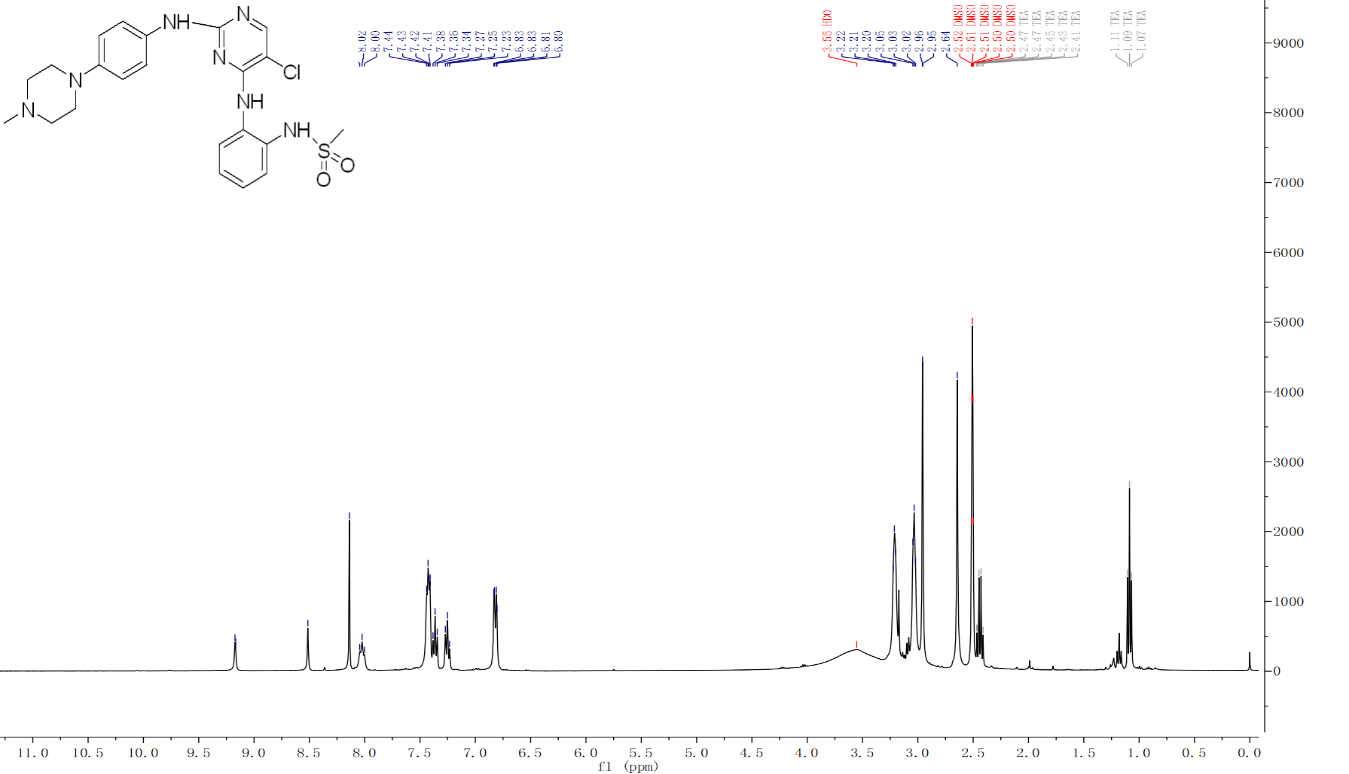


**C NMR of Compound 5e**


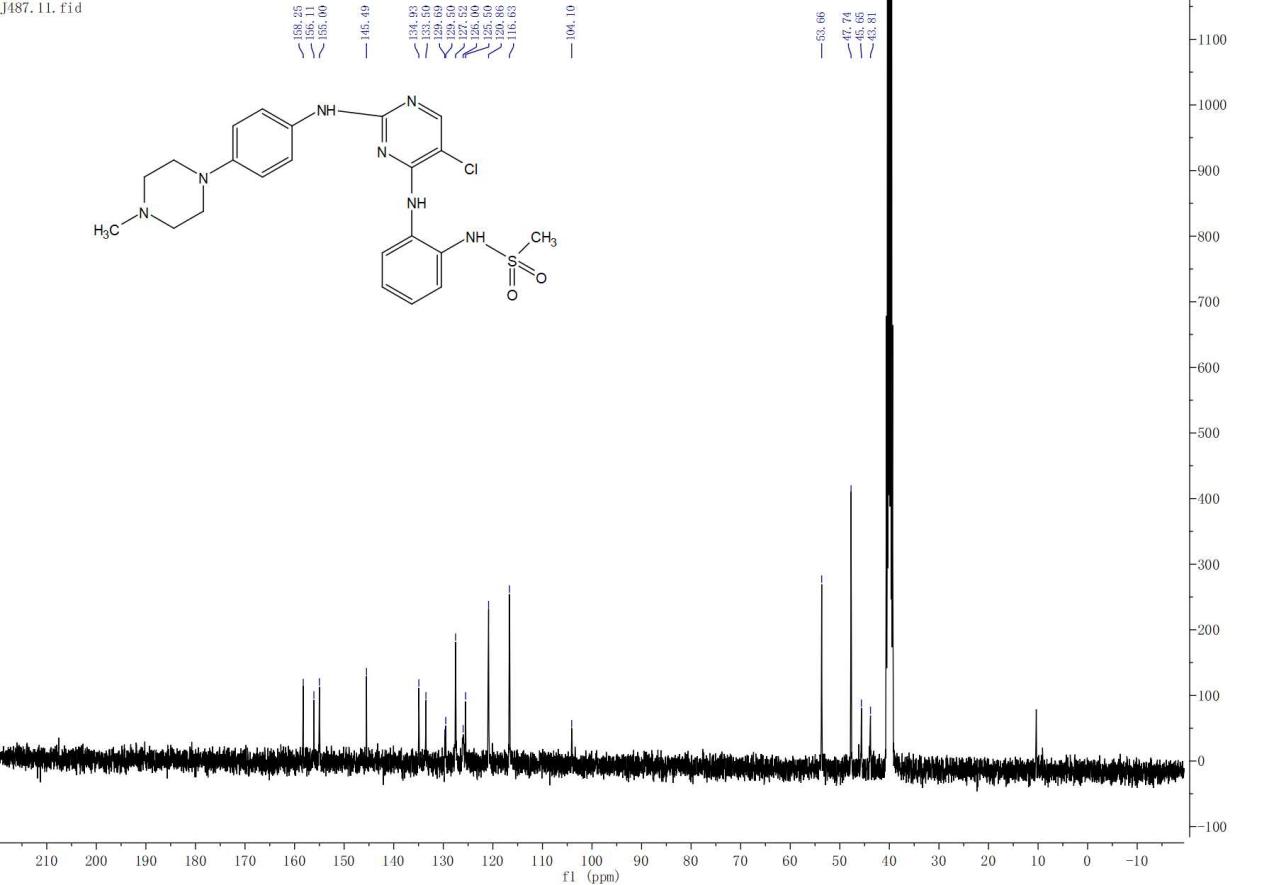


**H NMR of Compound 5f**


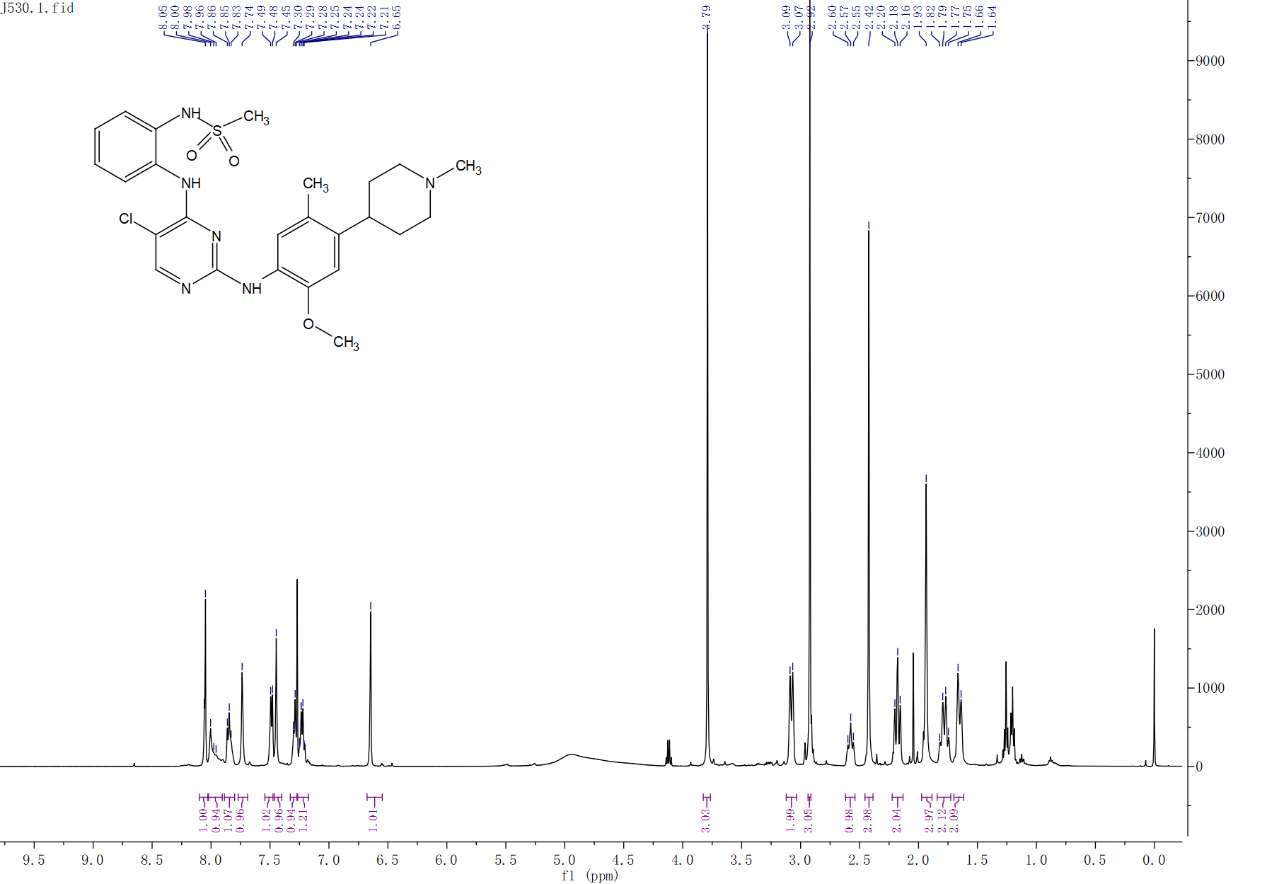


**C NMR of Compound 5f**


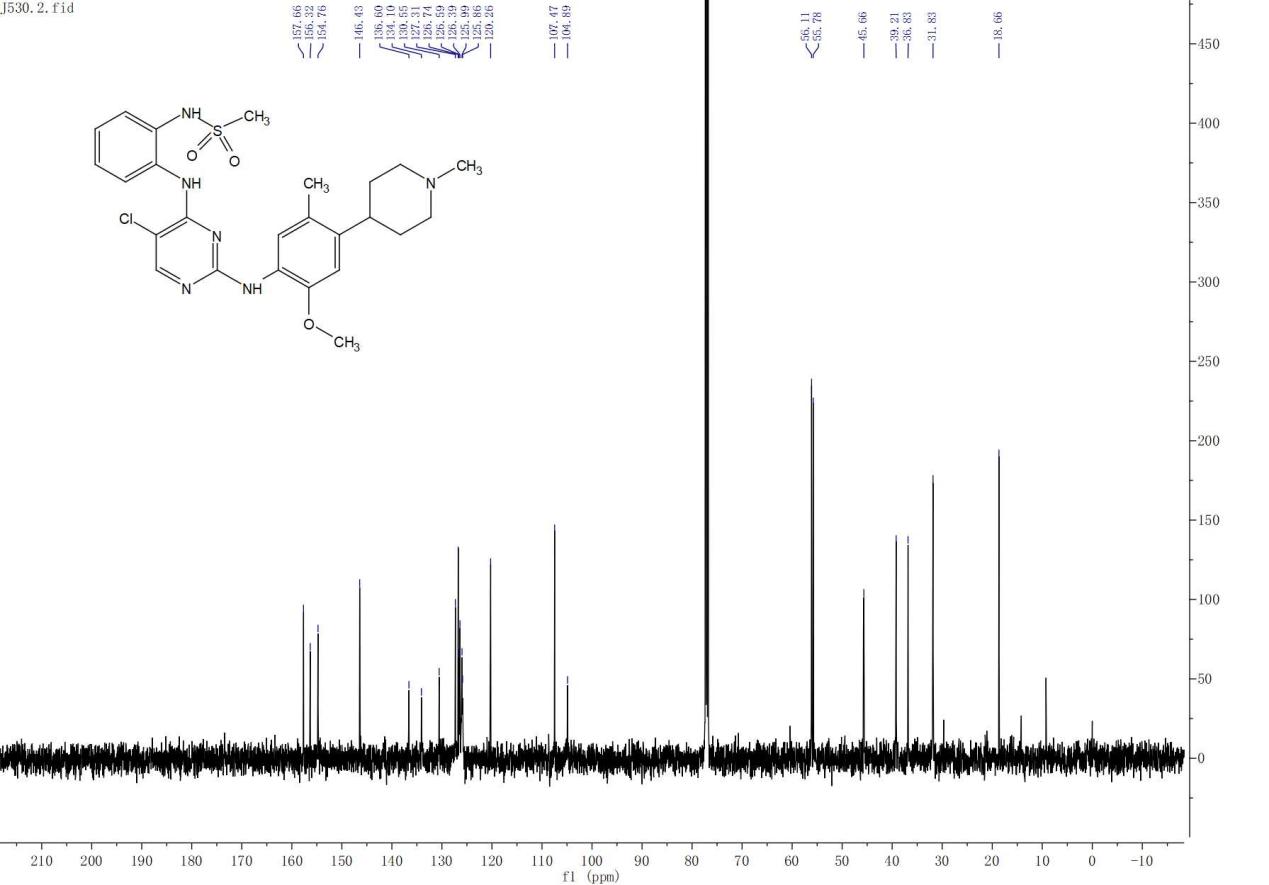


**H NMR of Compound 5g**


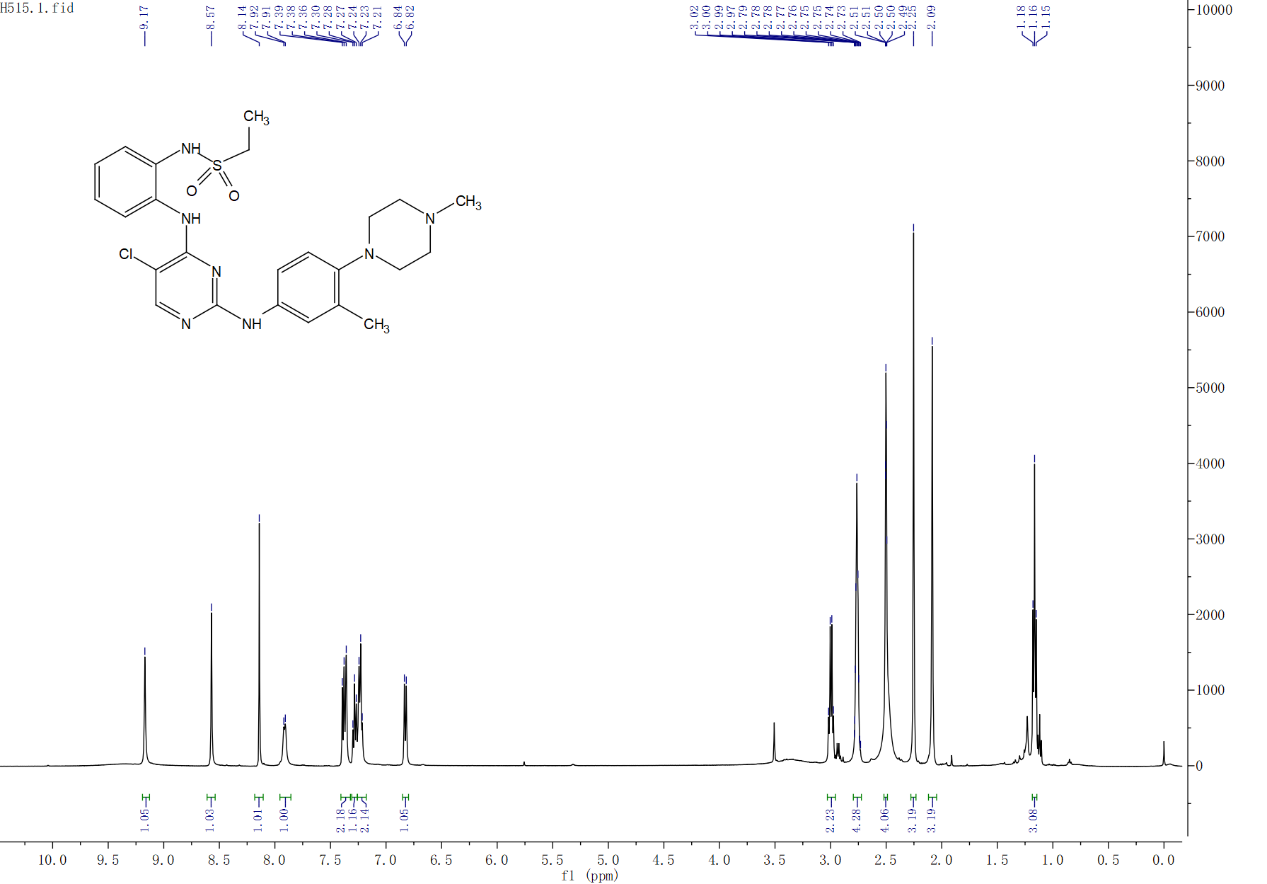


**C NMR of Compound 5g**


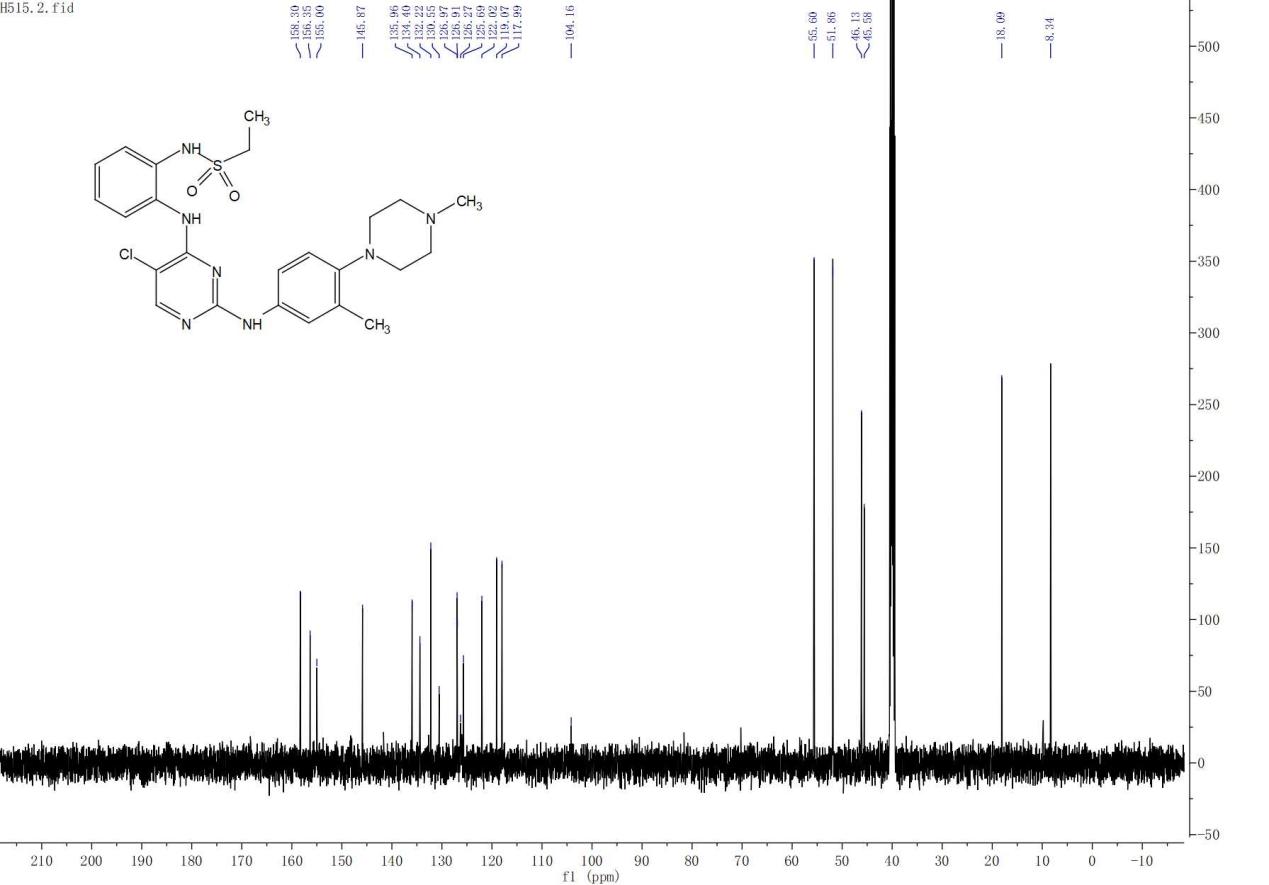


**H NMR of Compound 5h**


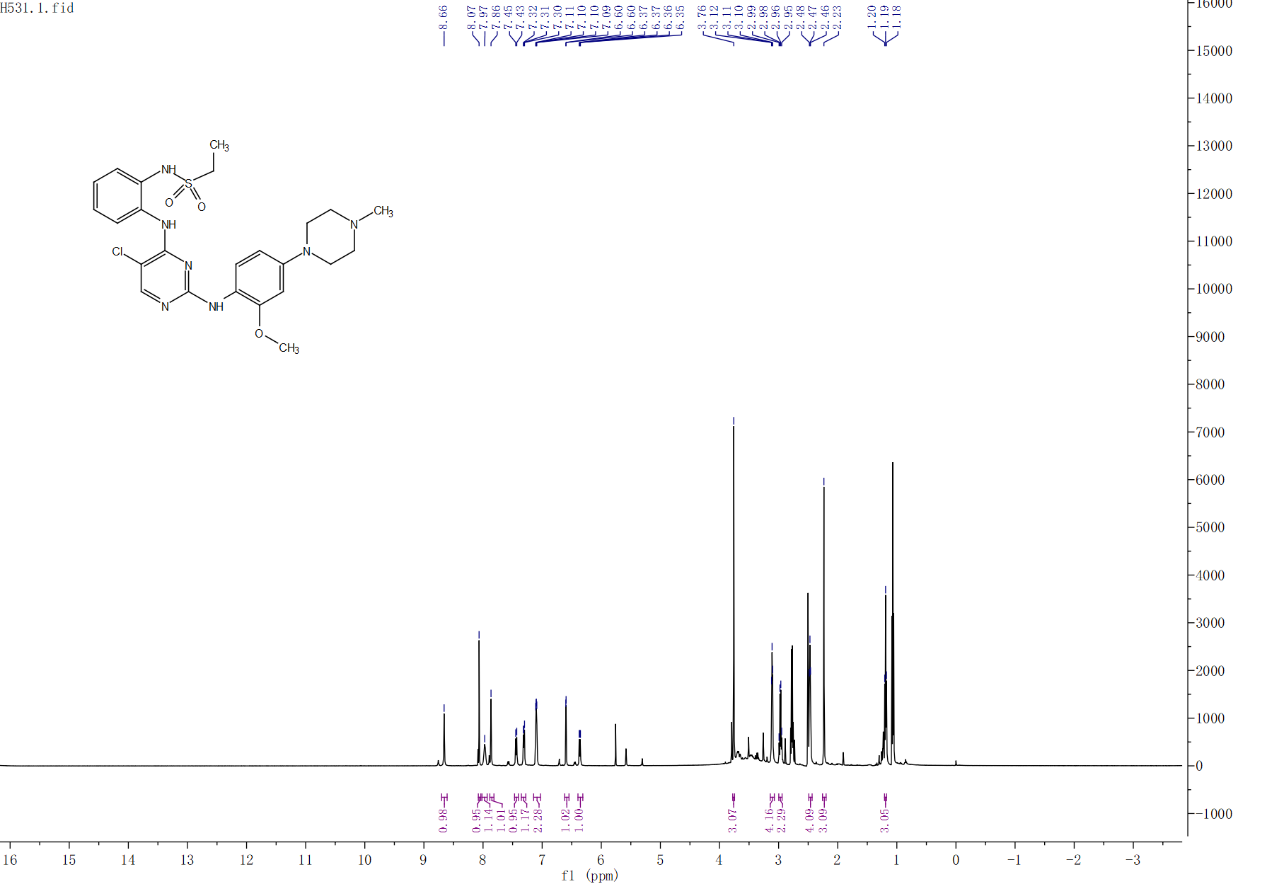


**C NMR of Compound 5h**


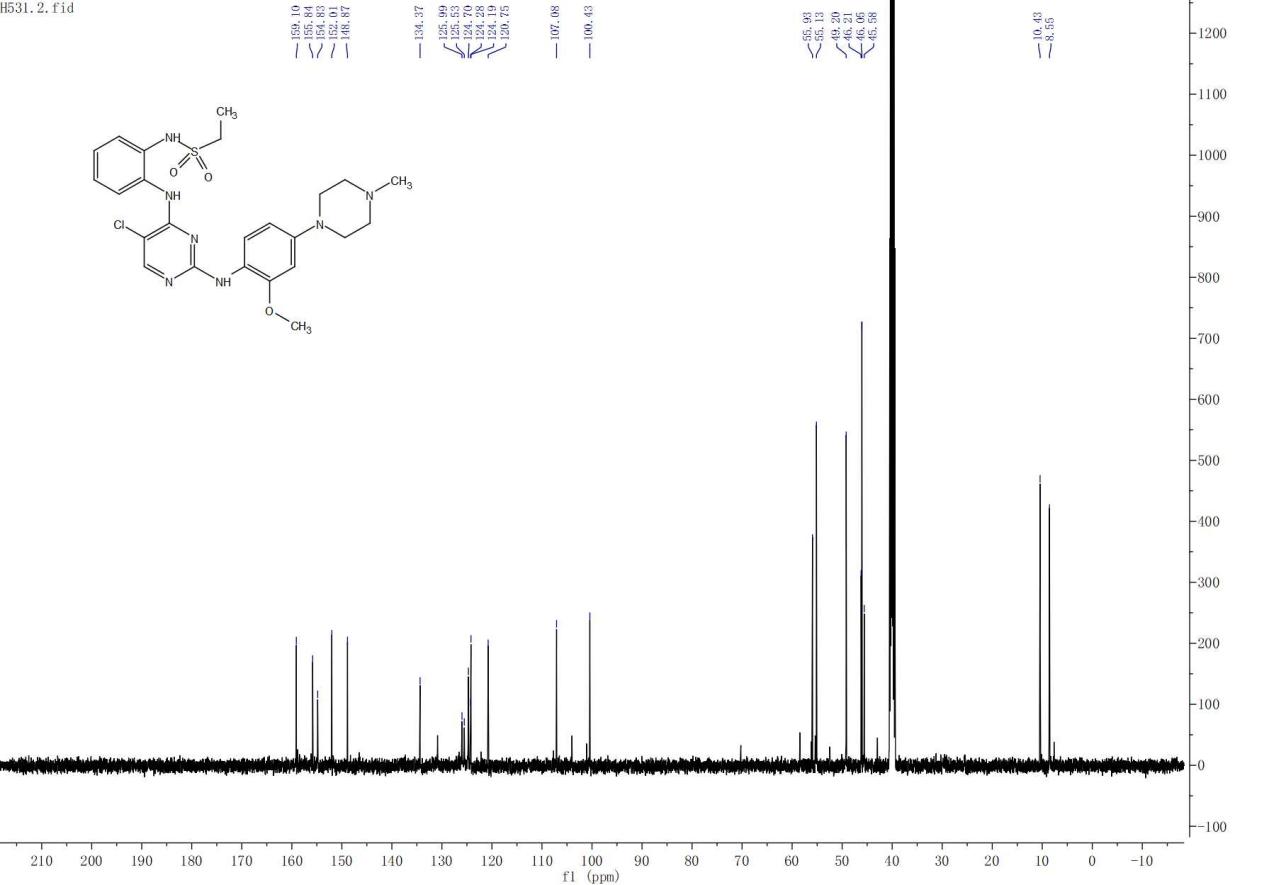


**H NMR of Compound 17a**


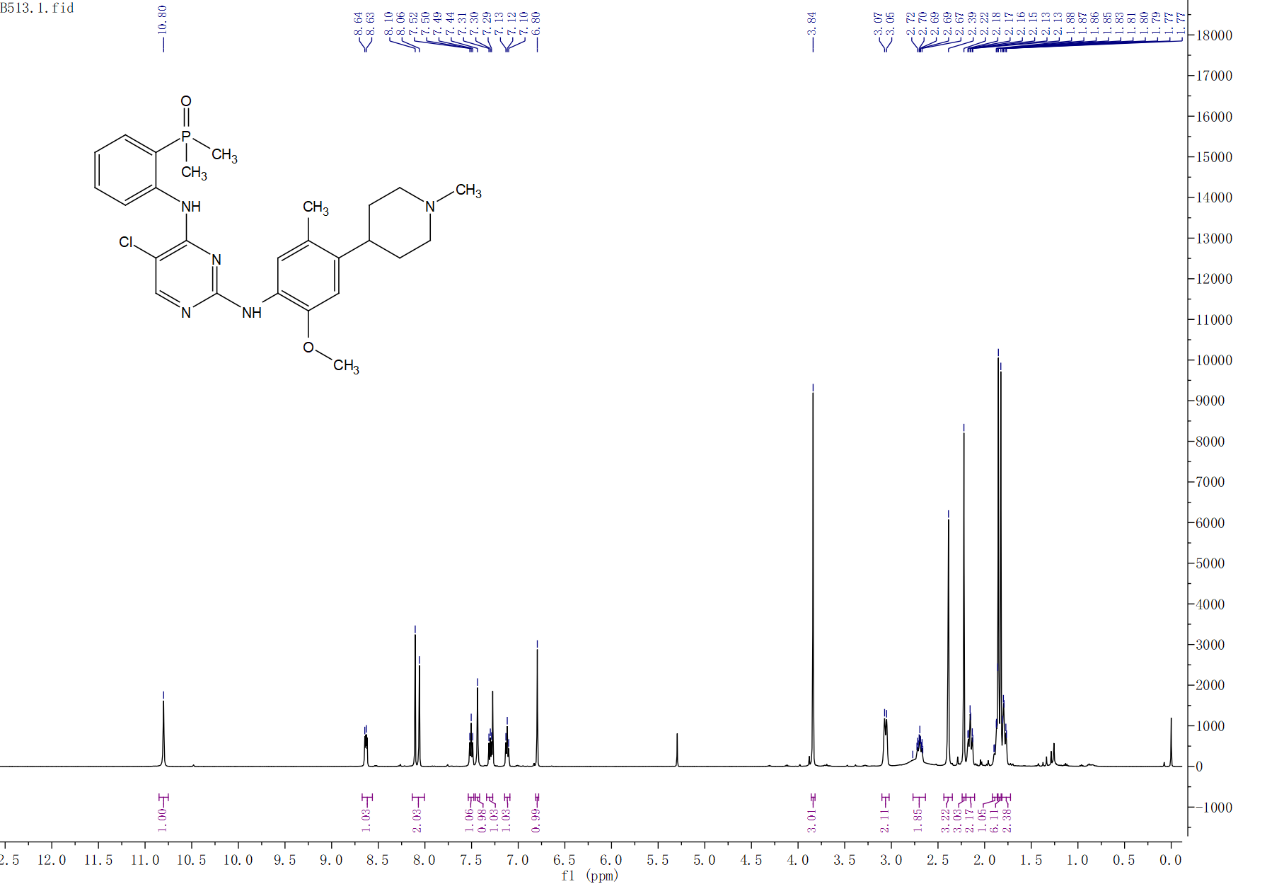


**C NMR of Compound 17a**


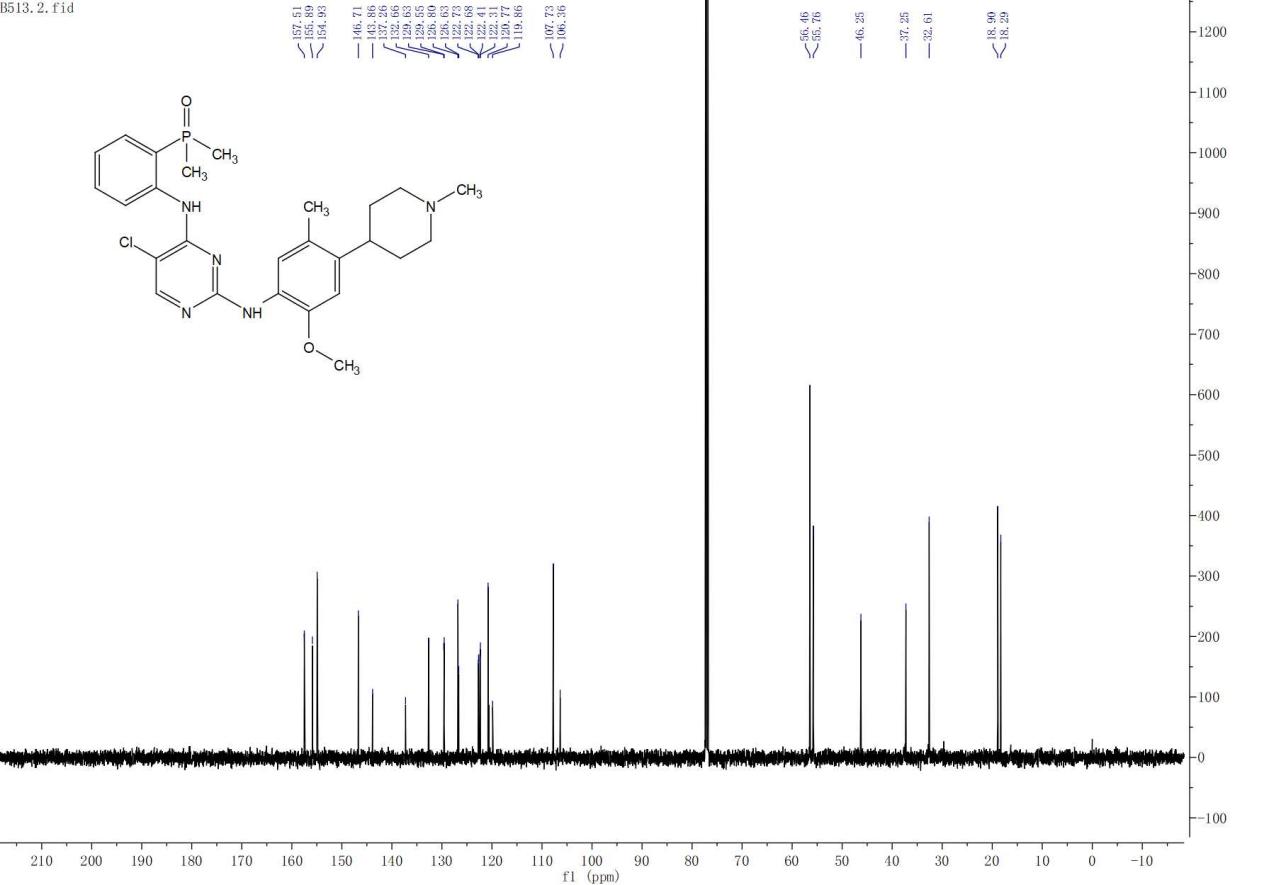


**H NMR of Compound 17b**


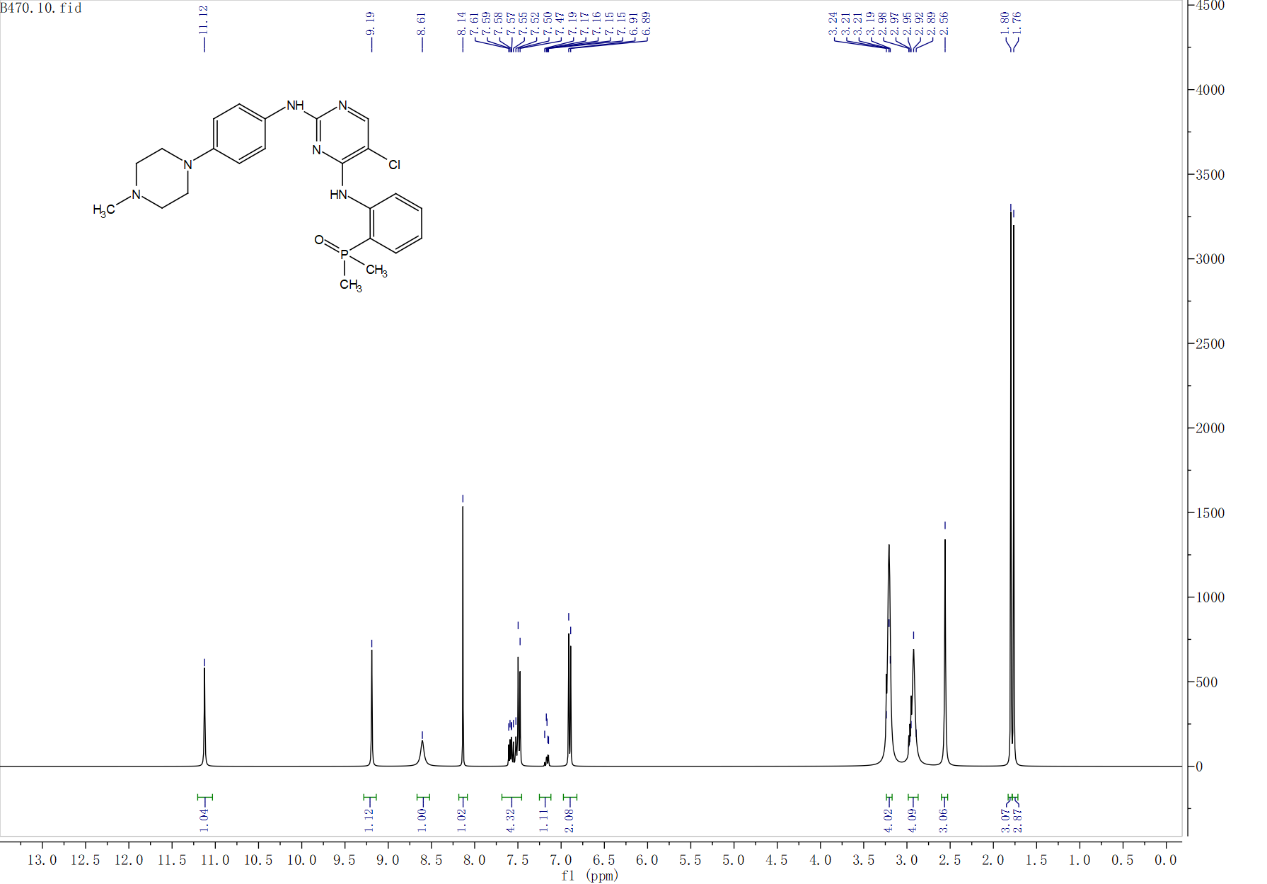


**C NMR of Compound 17b**


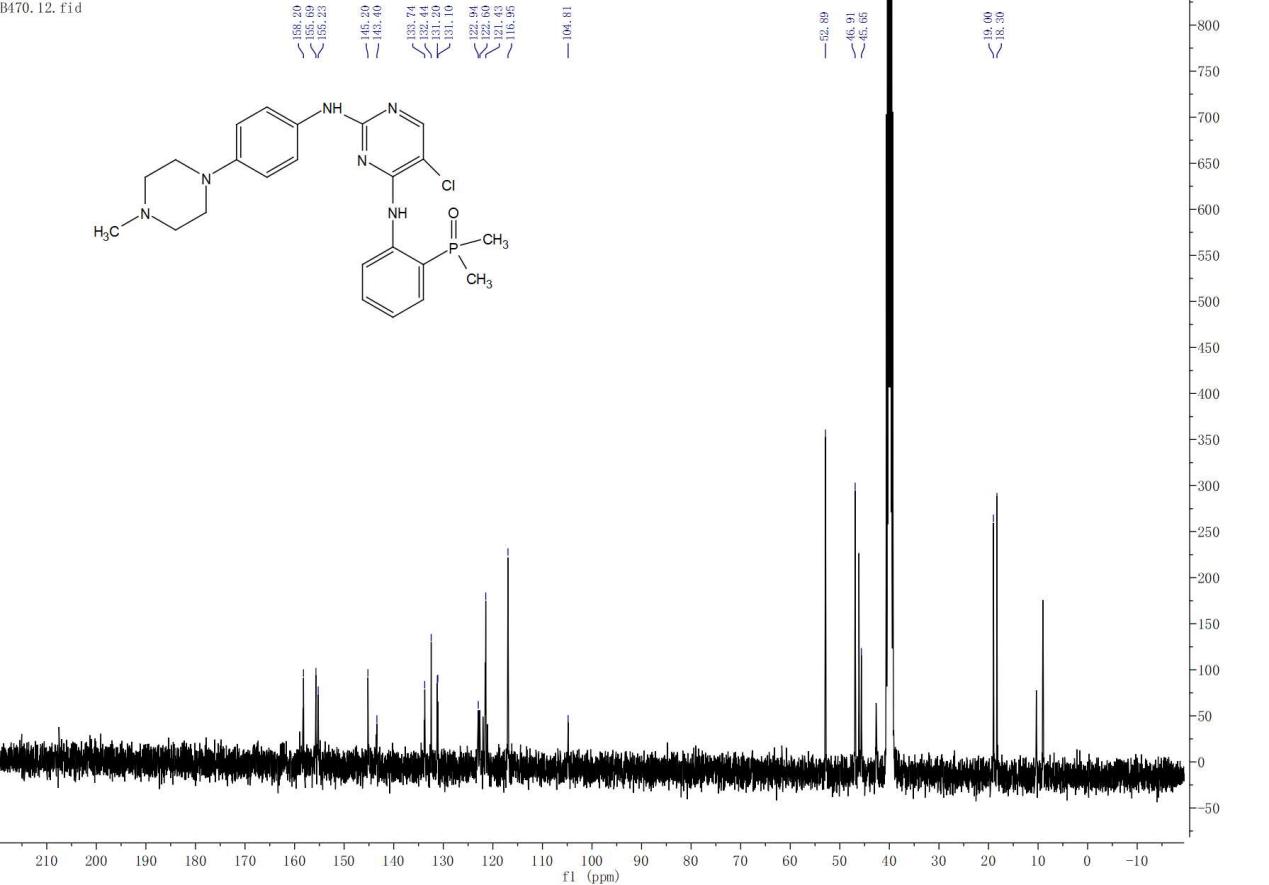


**HRMS of 5a**

**
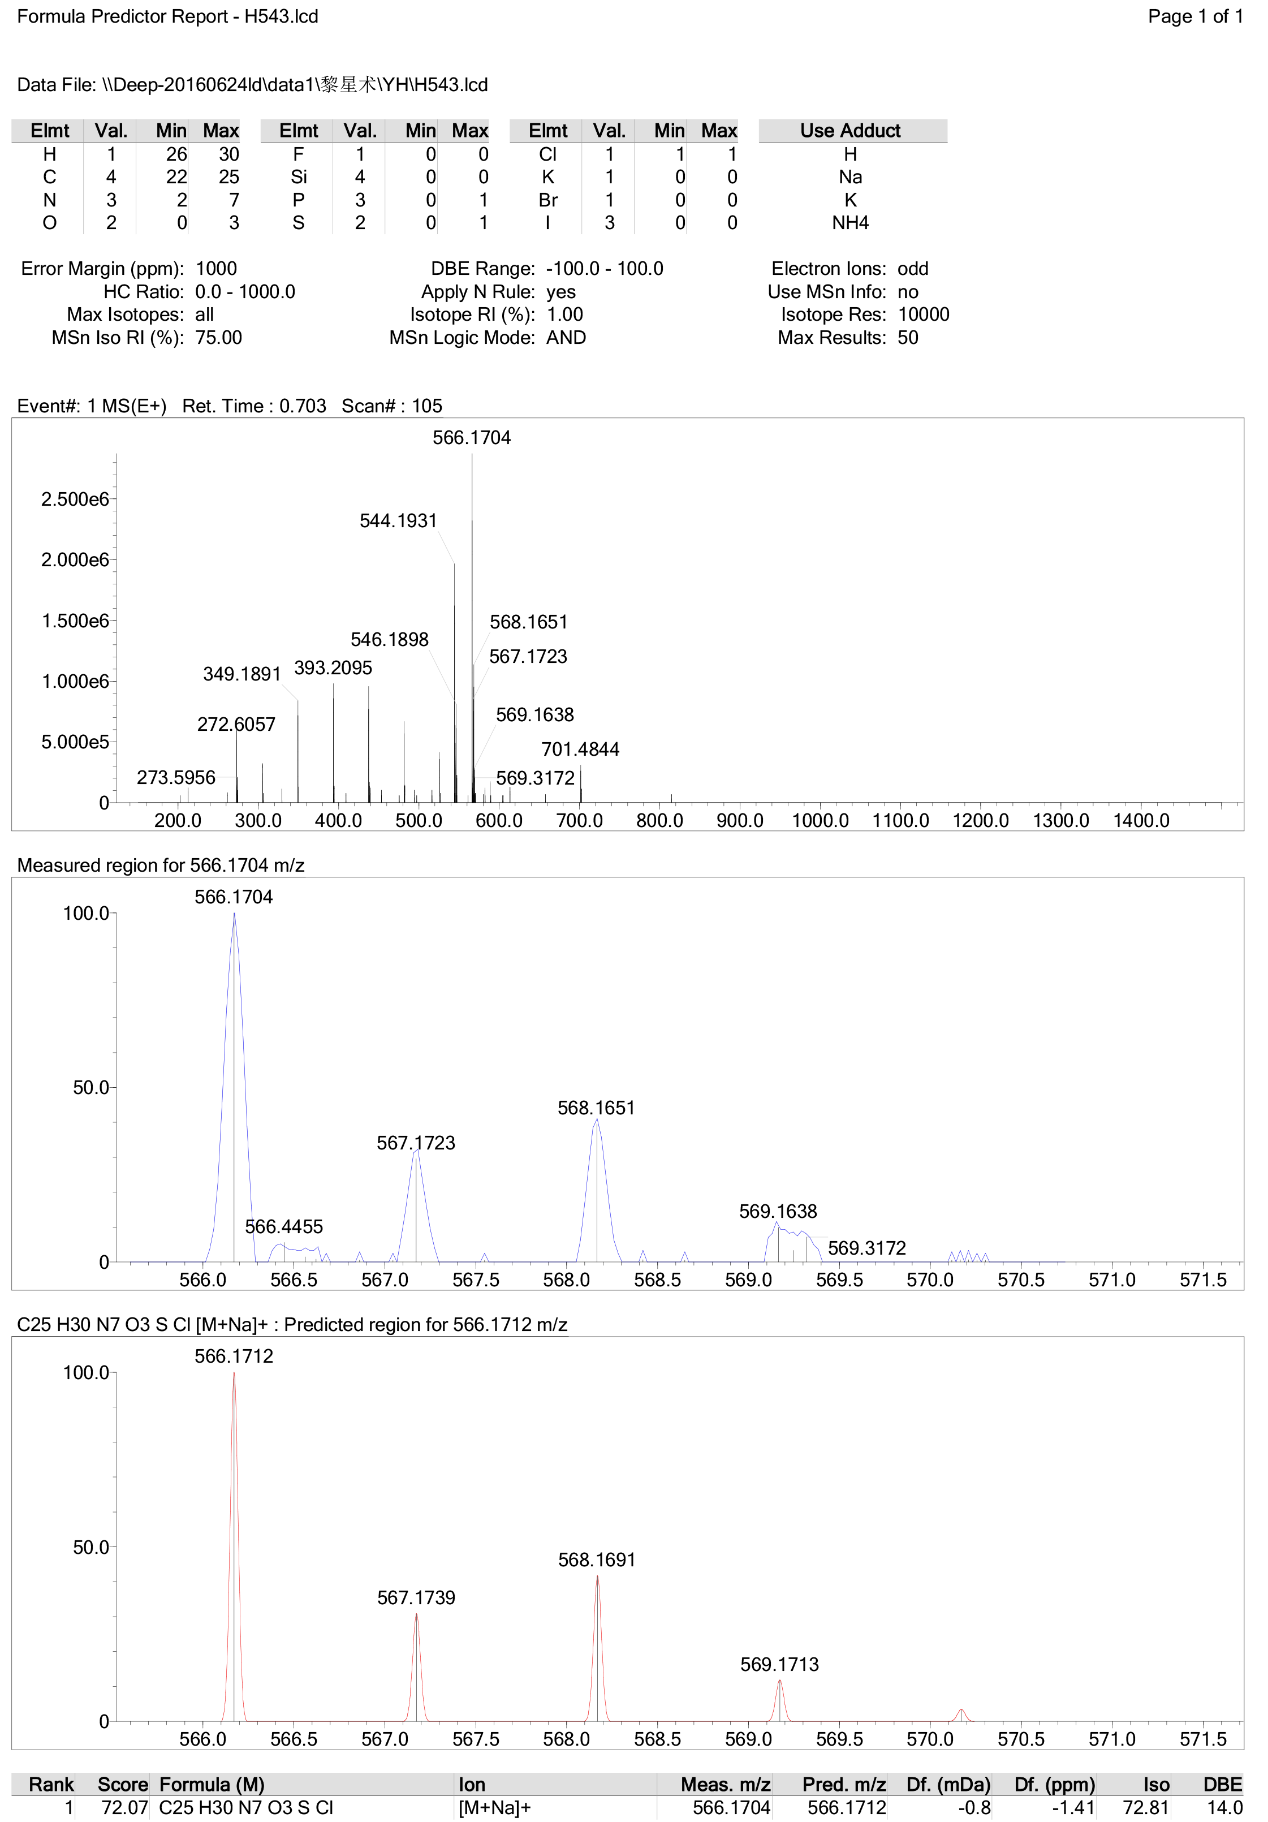
**

**HRMS of 5b**

**
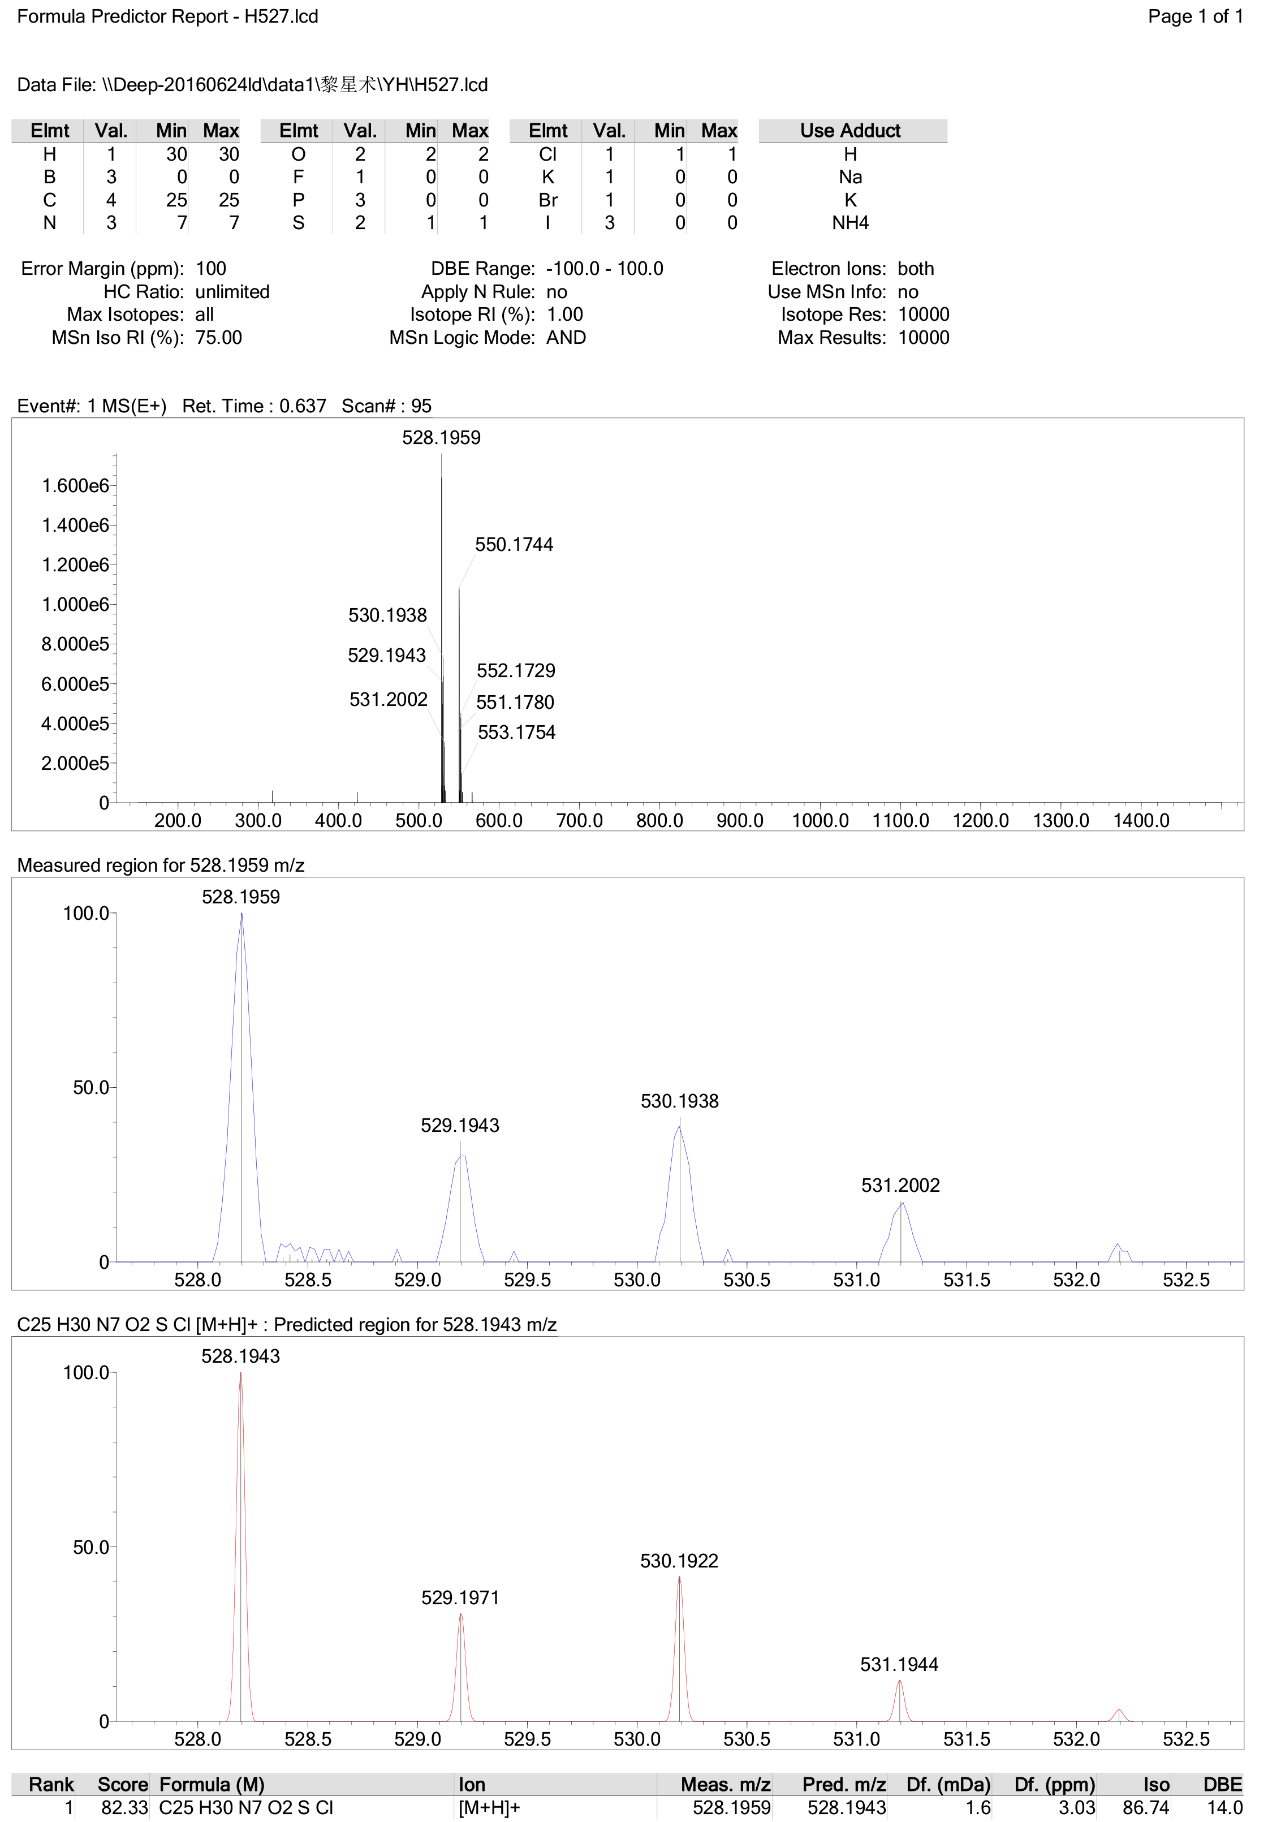
**

**HRMS of 5c**

**
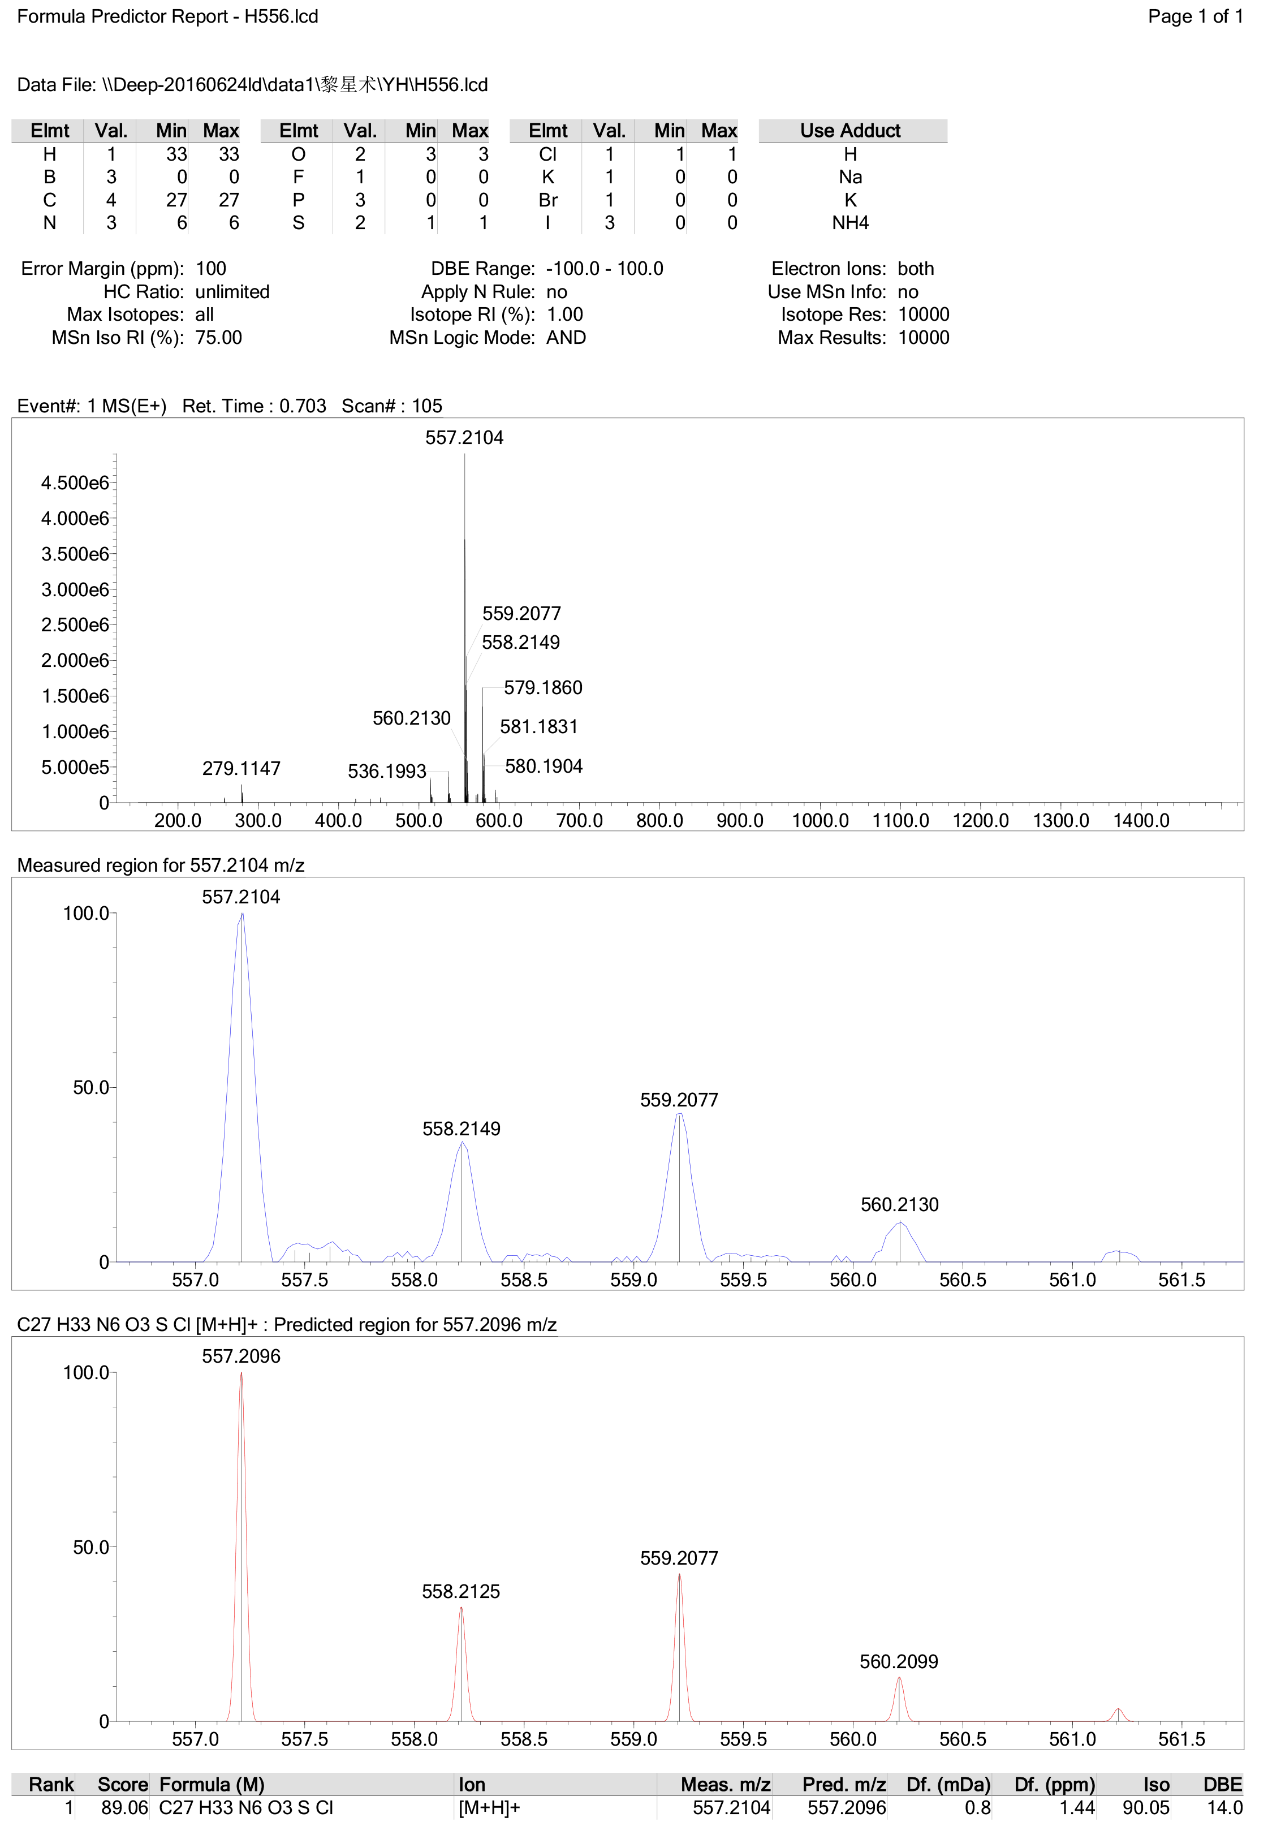
**

**HRMS of 5d**

**
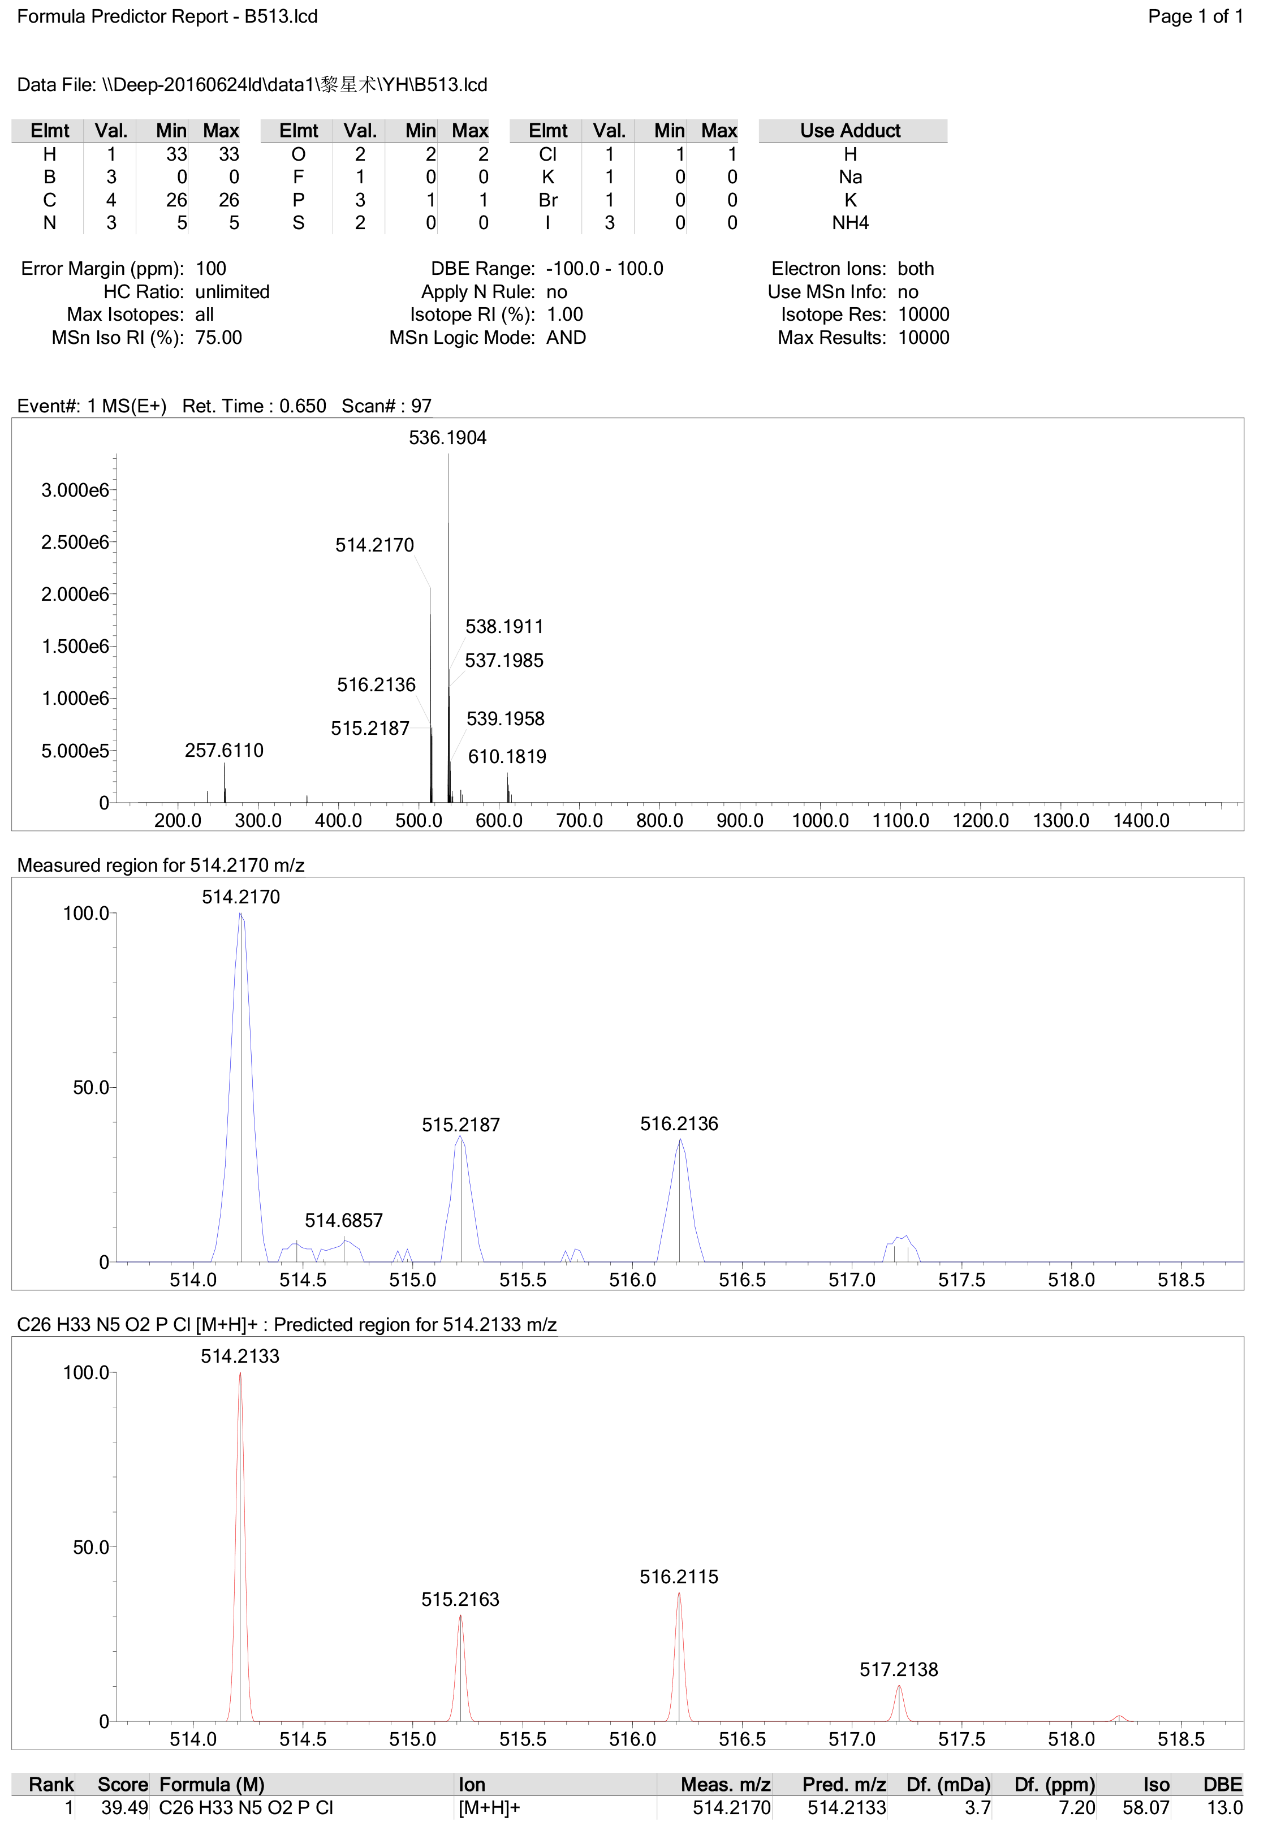
**

**HRMS of 5e**

**
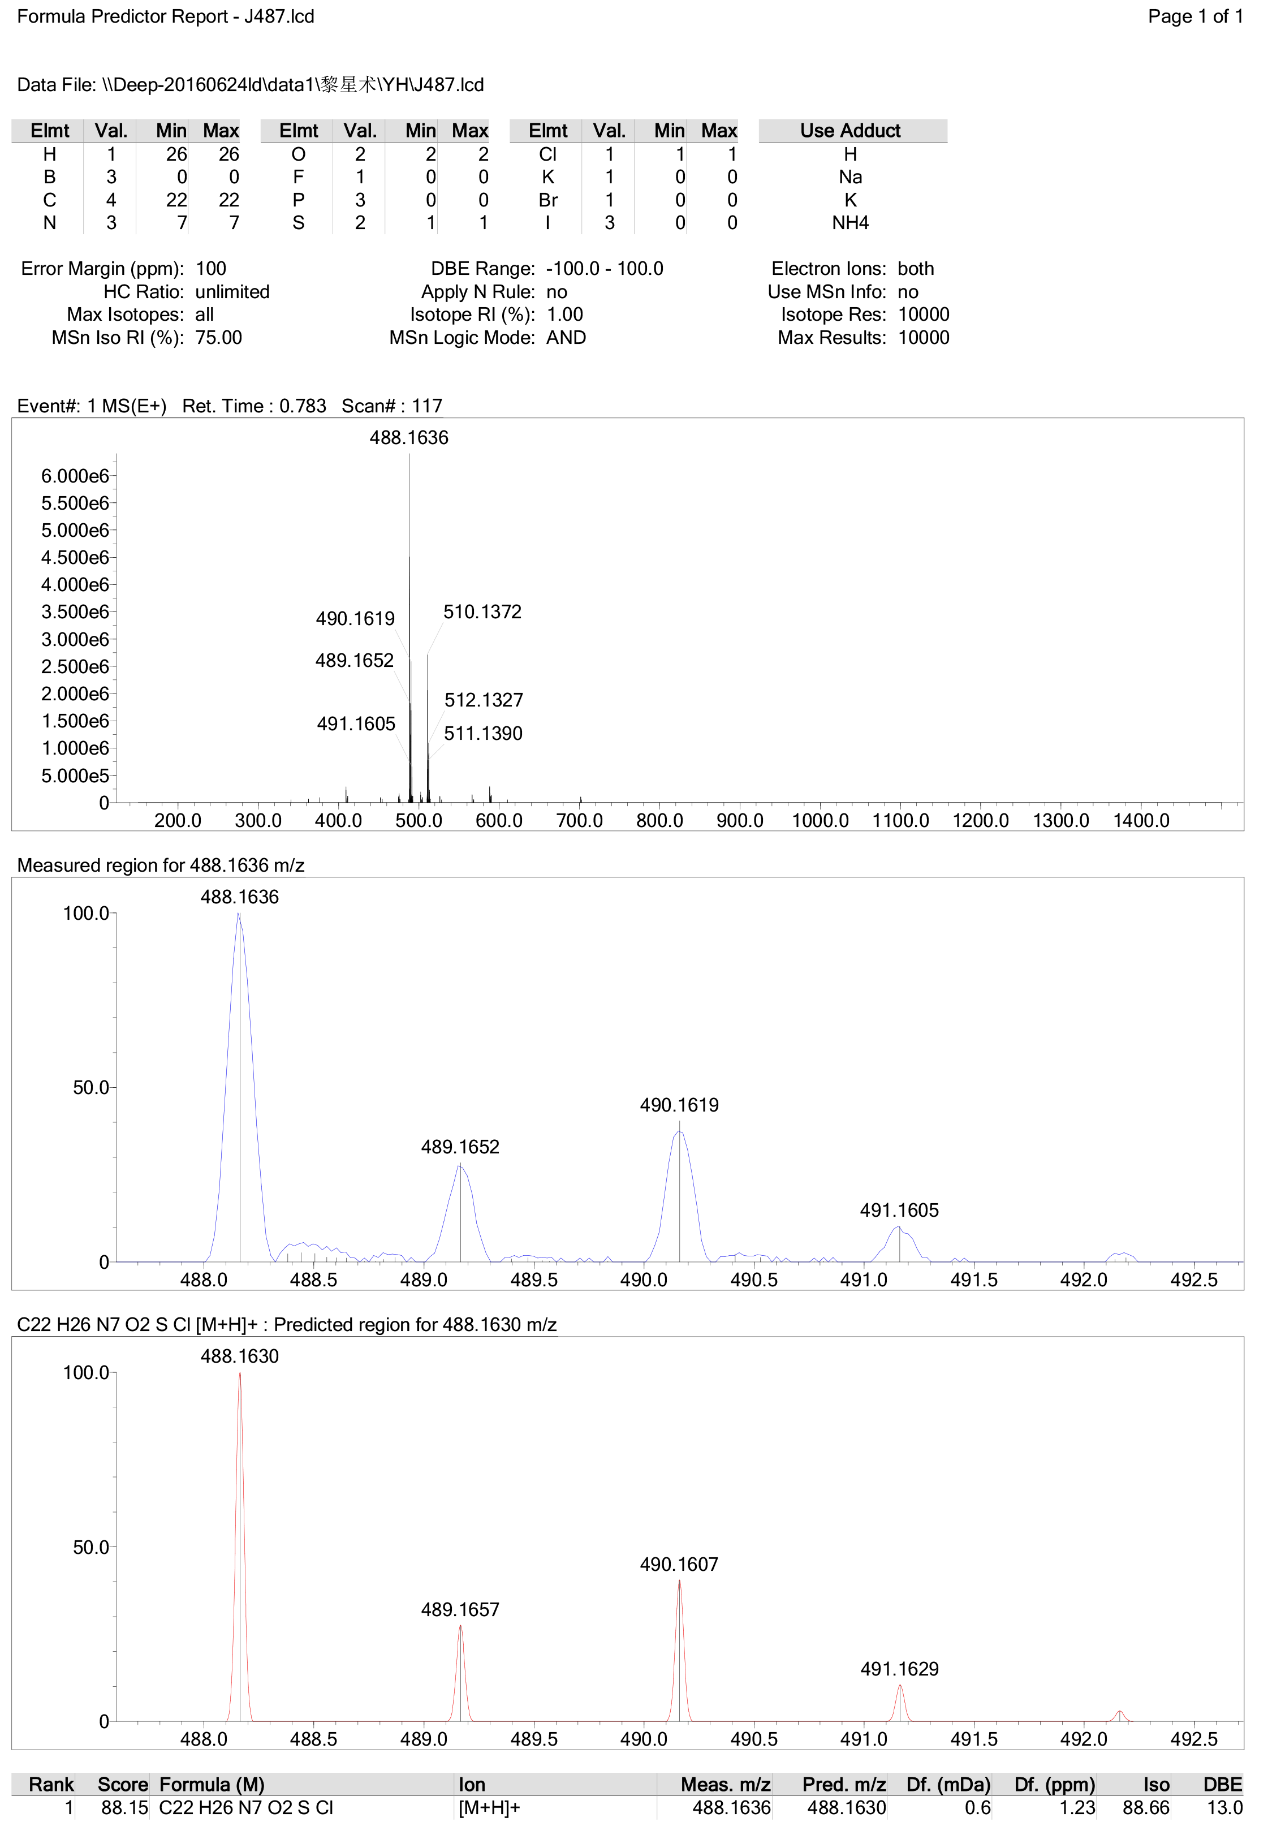
**

**HRMS of 5f**

**
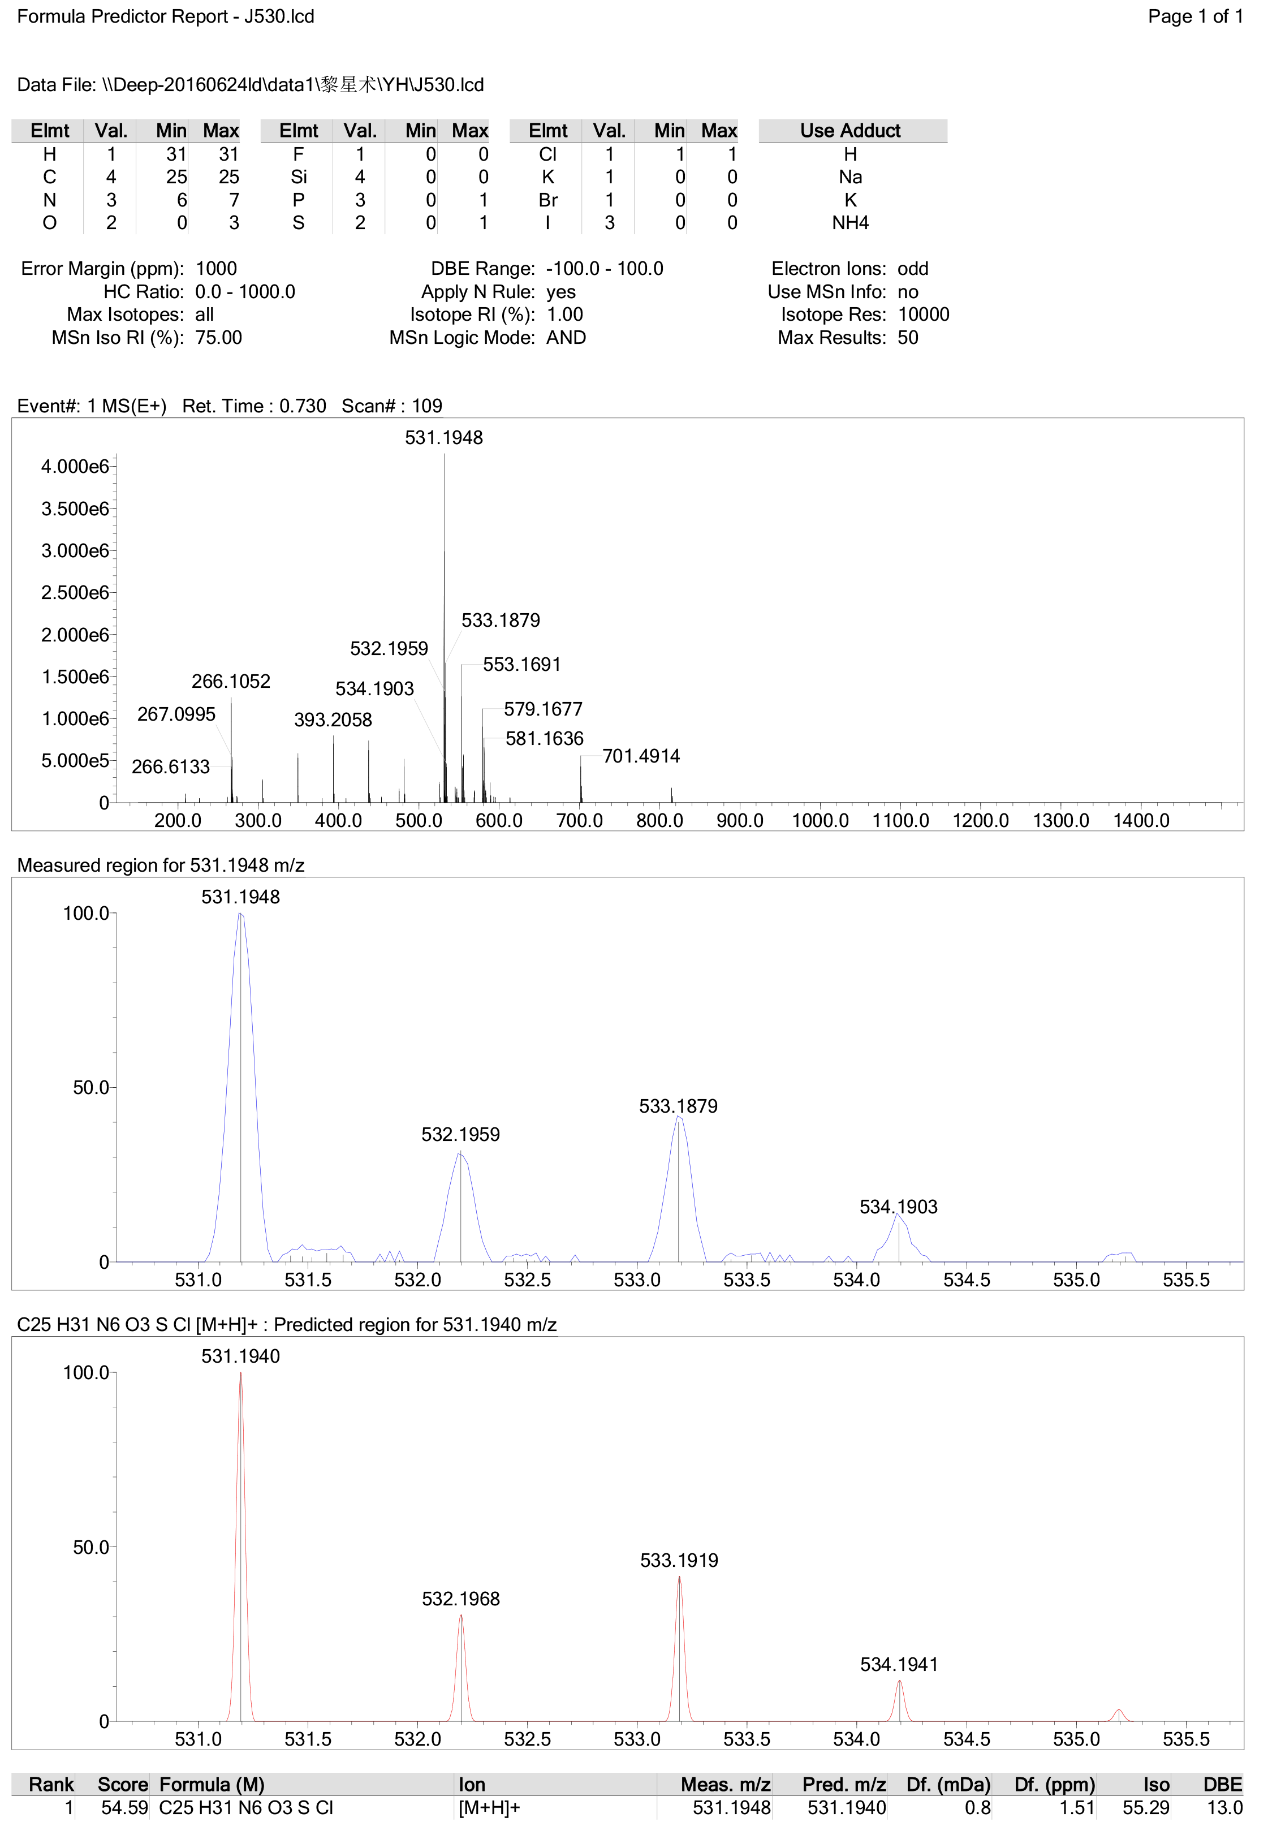
**

**HRMS of 5g**

**
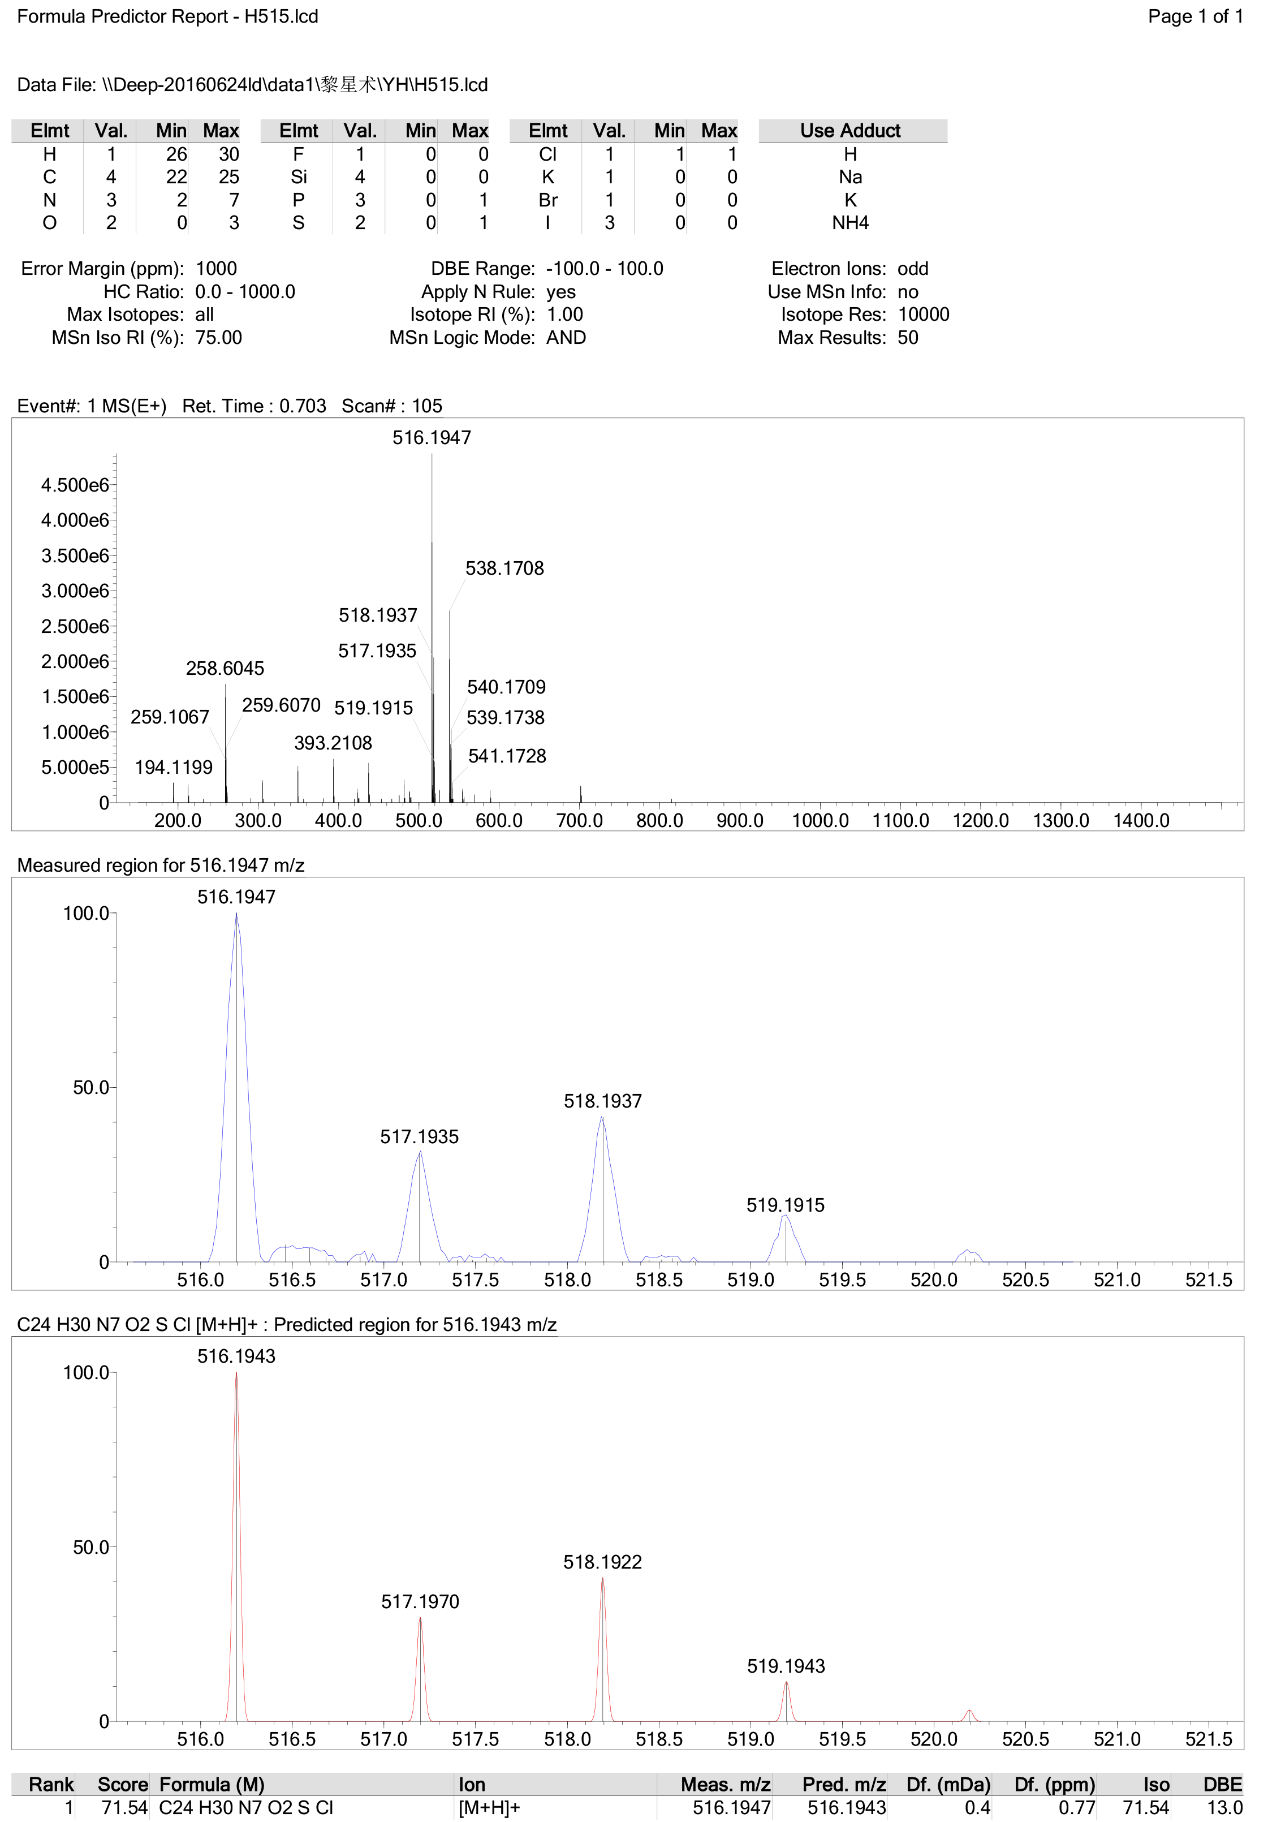
**

**HRMS of 5h**

**
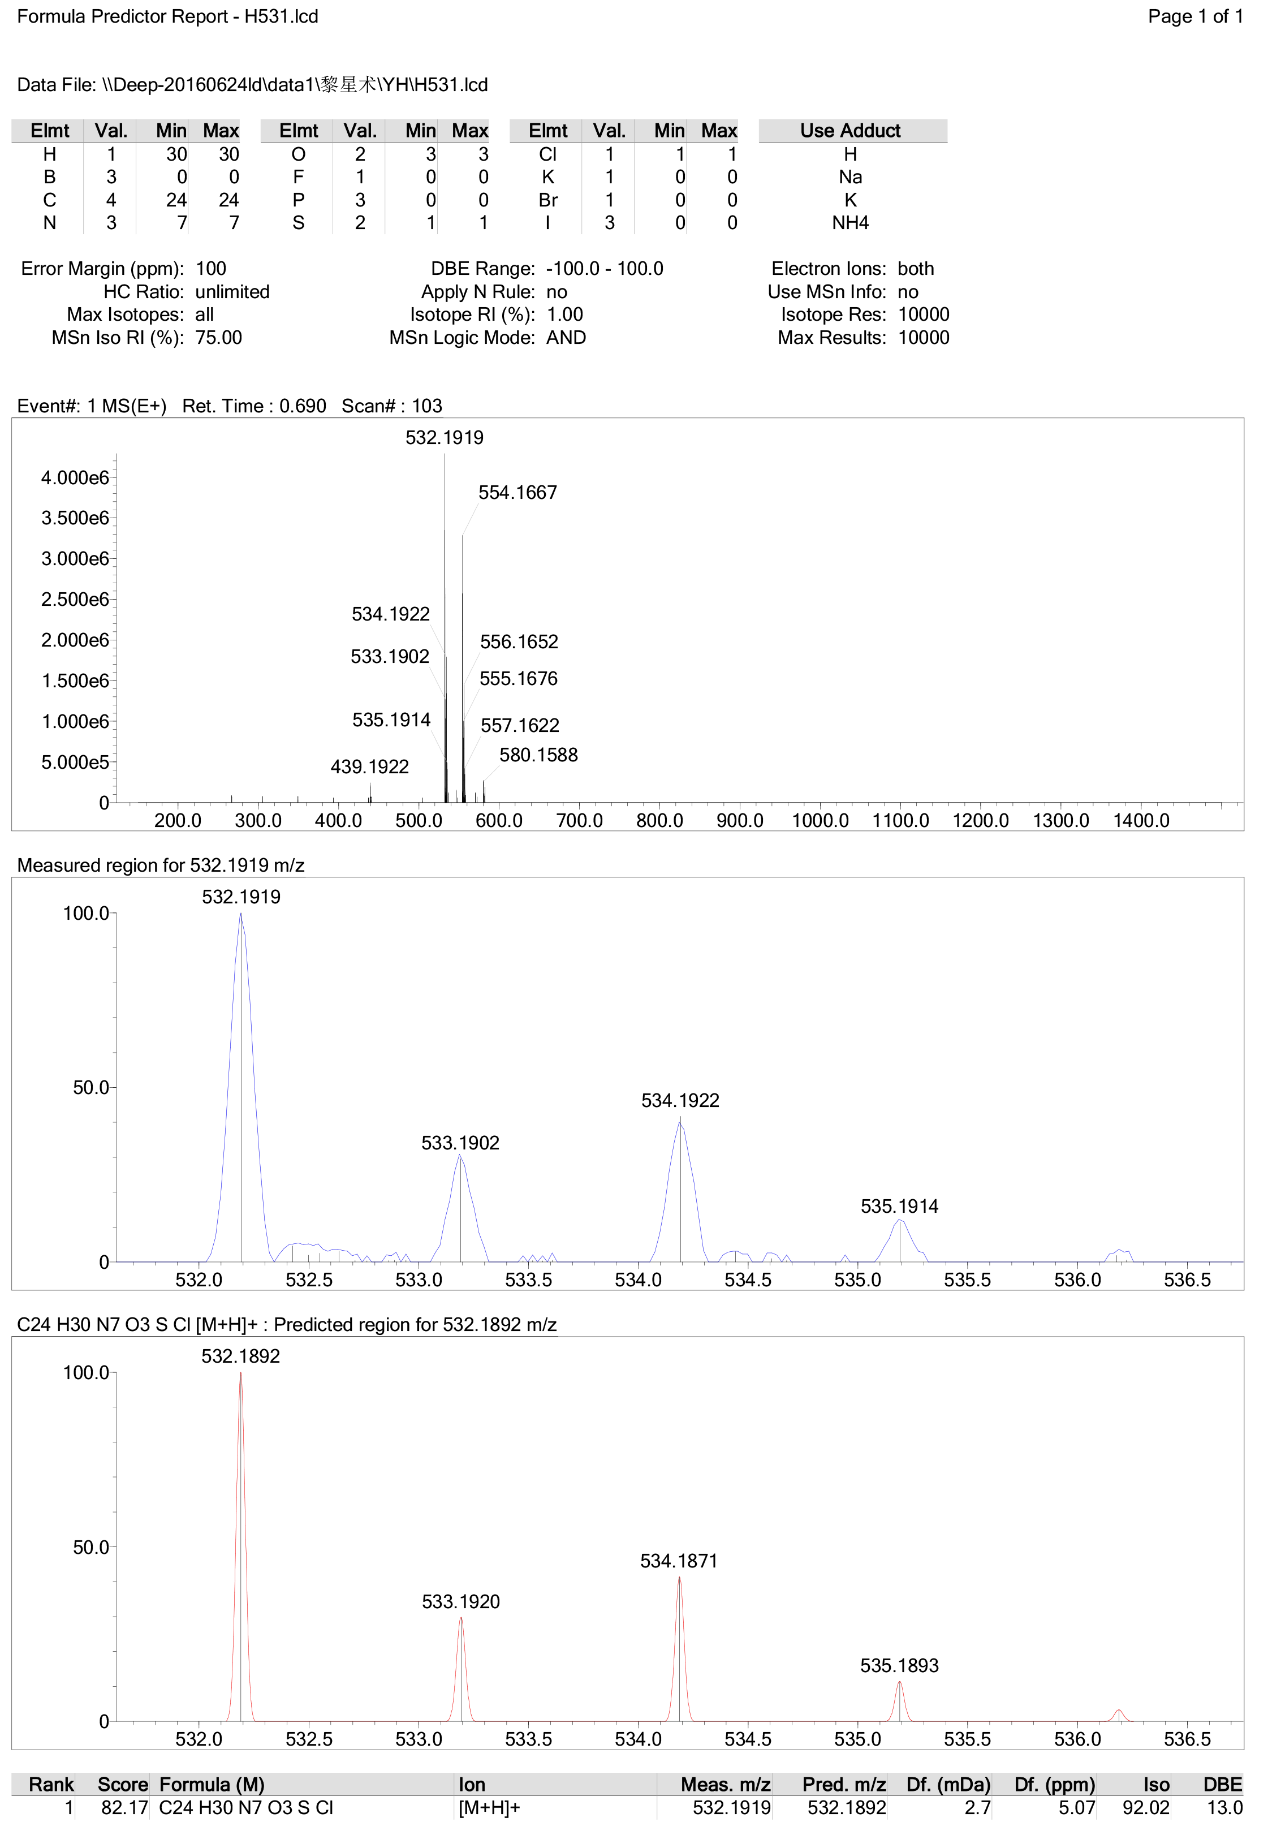
**

**HRMS of 17a**

**
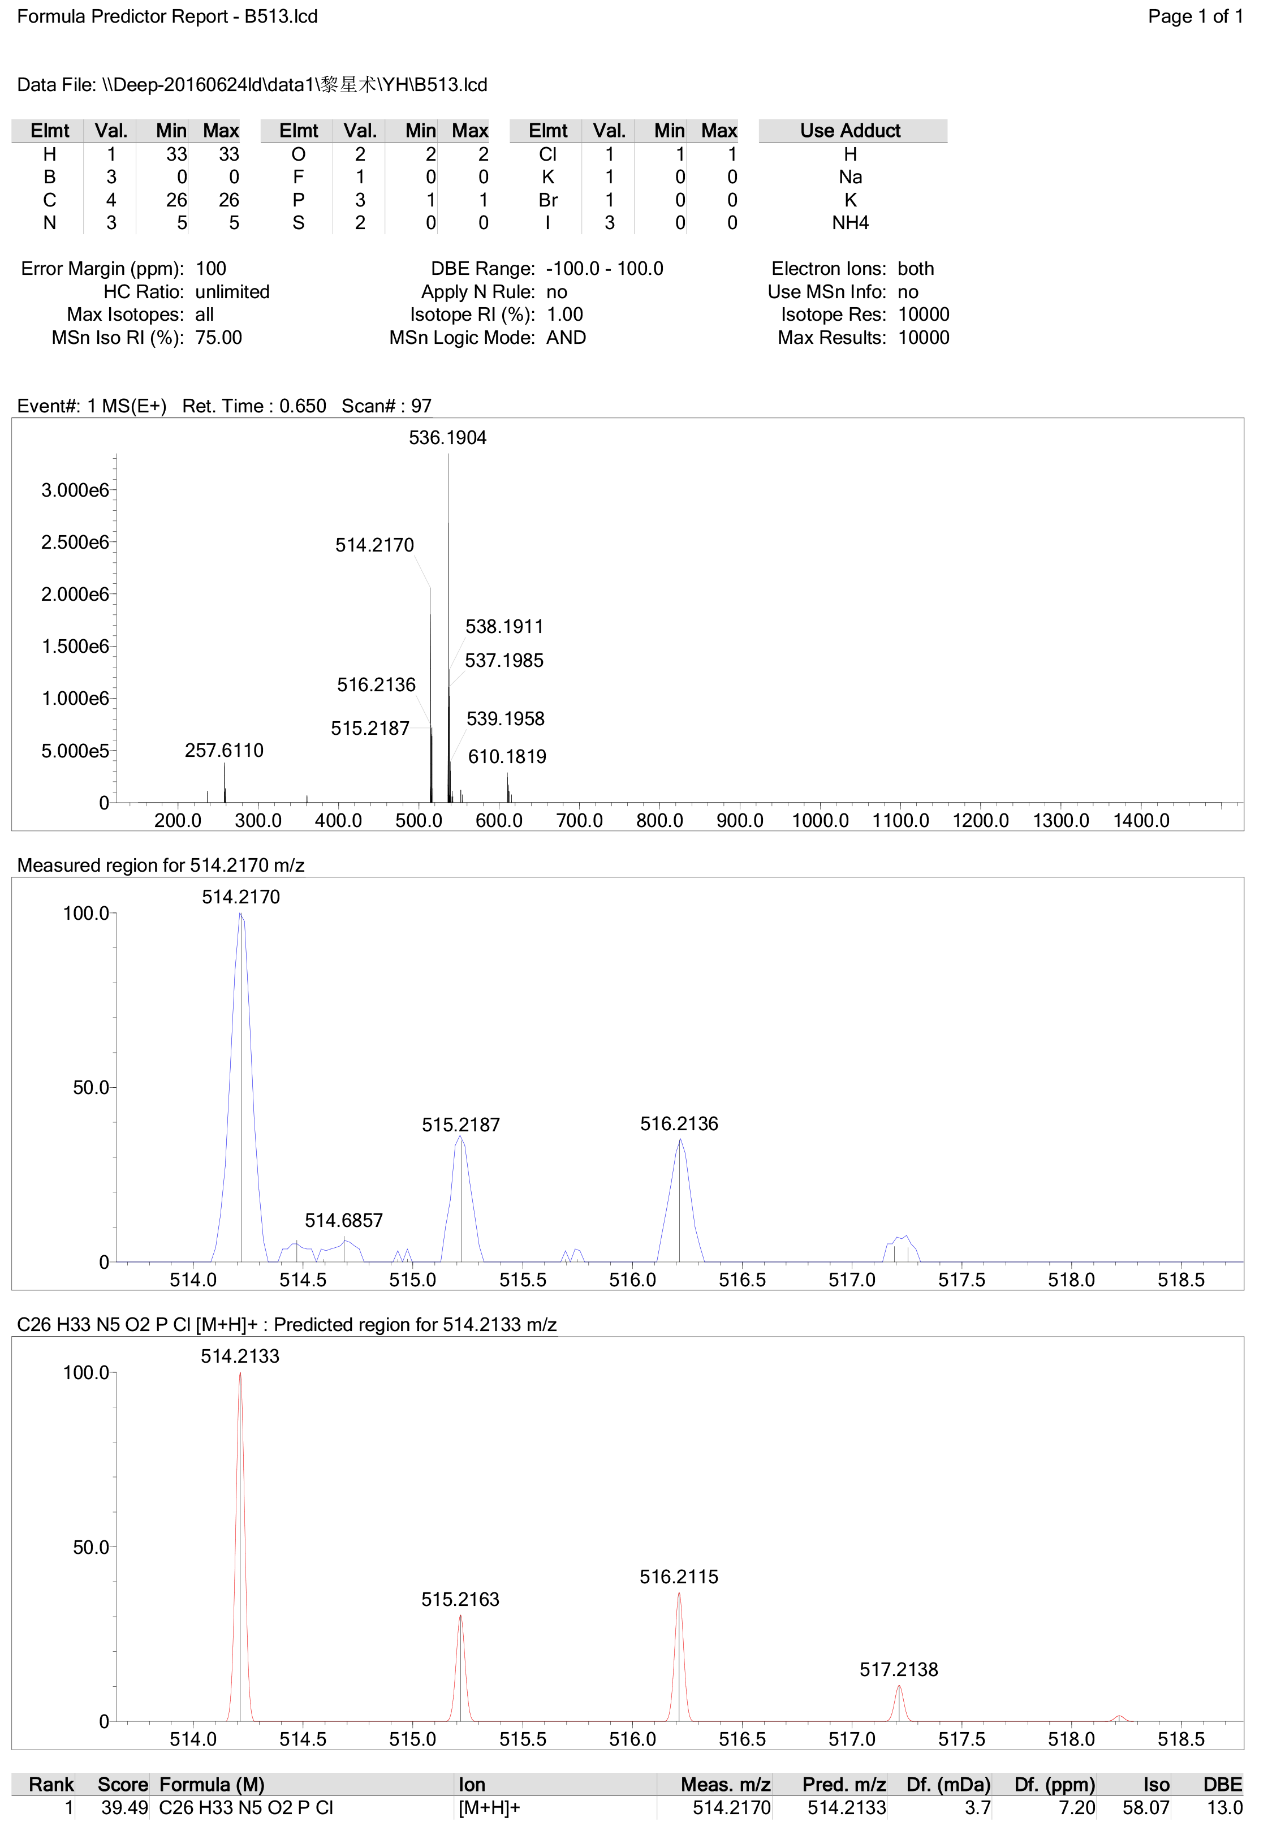
**

**HRMS of 17b**

**
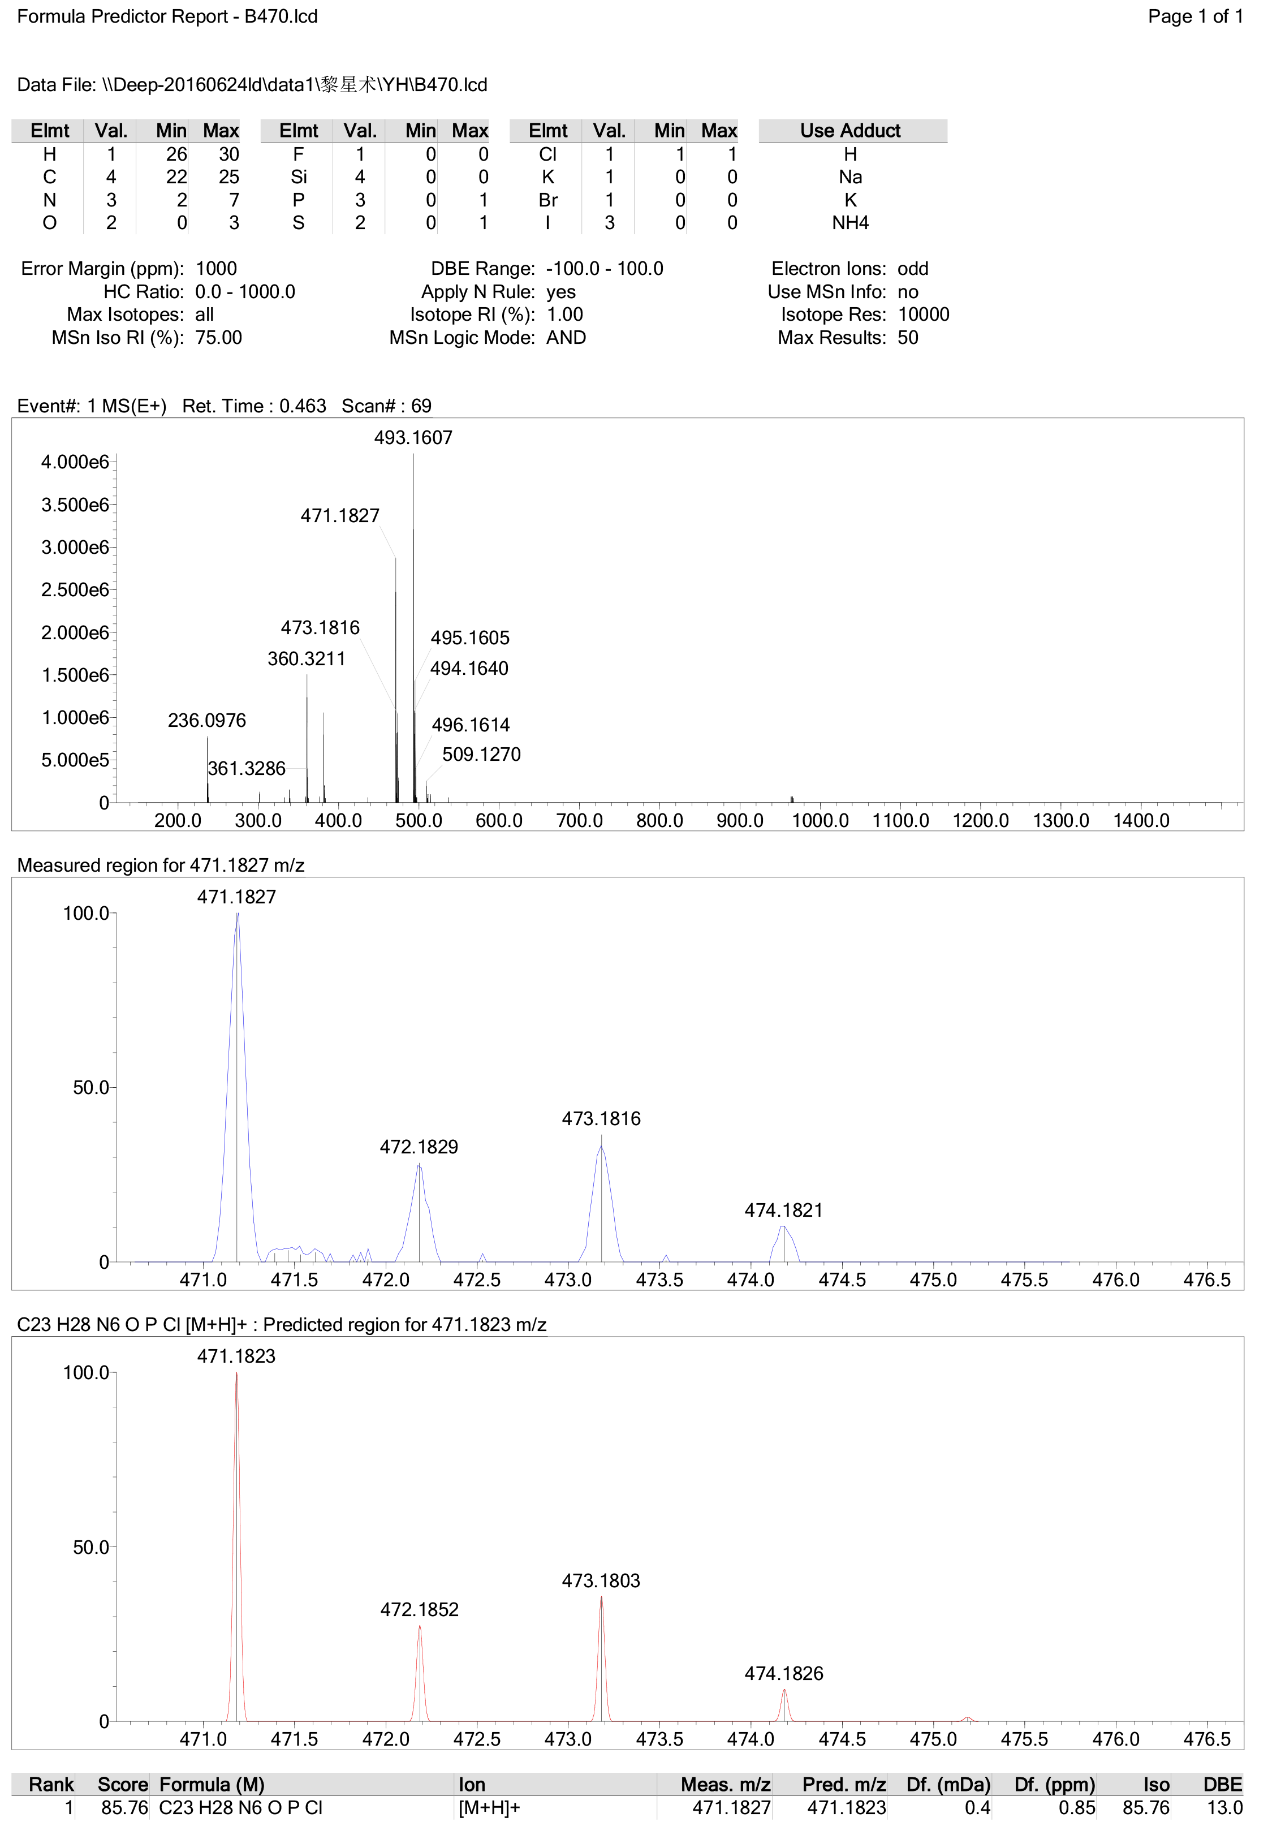
**

**HPLC purity of 5a (97.16%)**

**
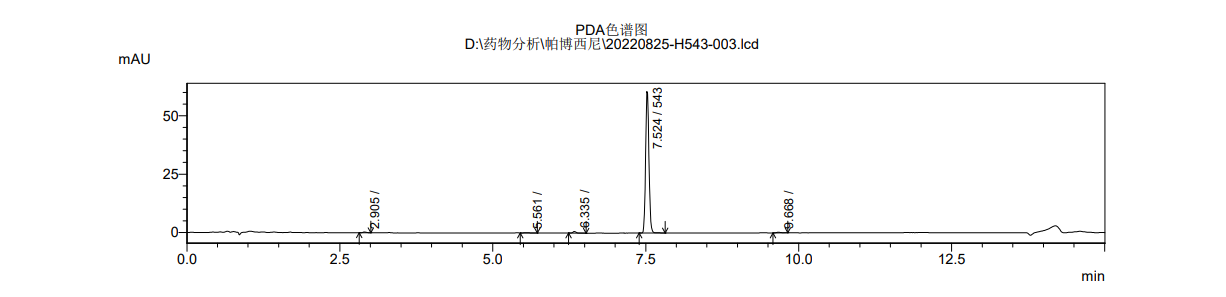

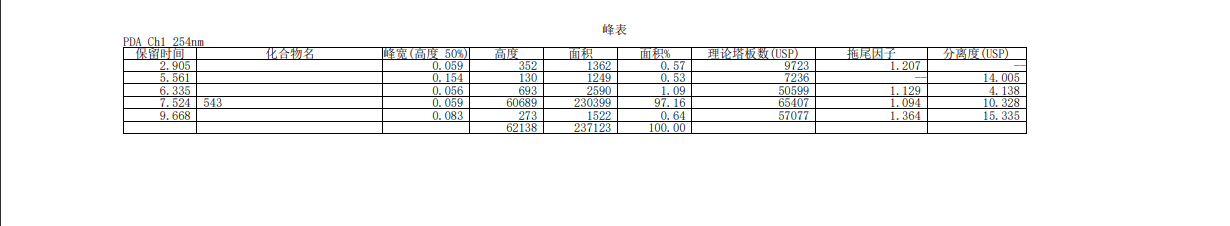
**

**HPLC purity of 5b (99.55%)**

**
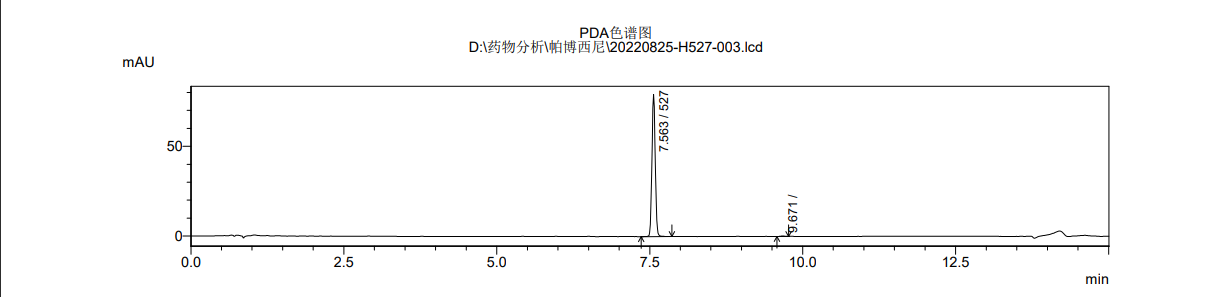

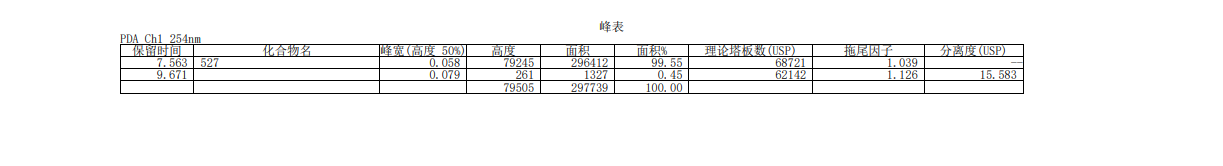
**

**HPLC purity of 5c (96.54%)**

**
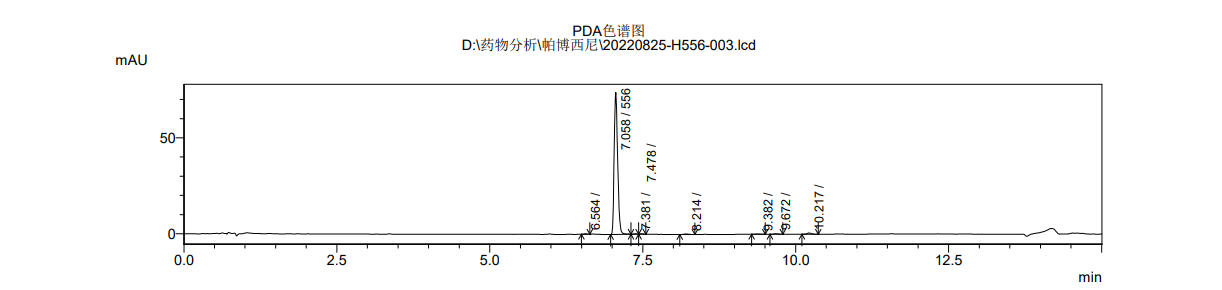

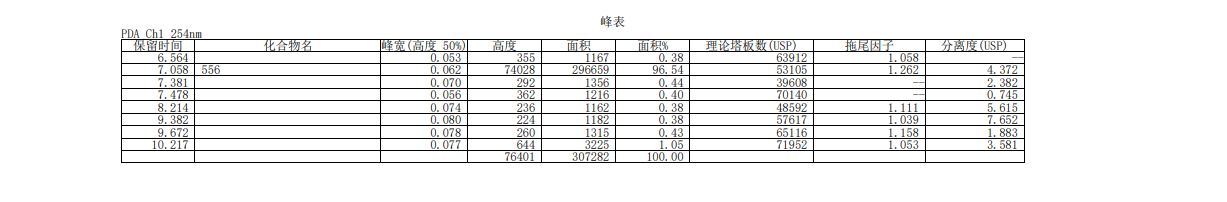
**

**HPLC purity of 5d (95.87%)**

**
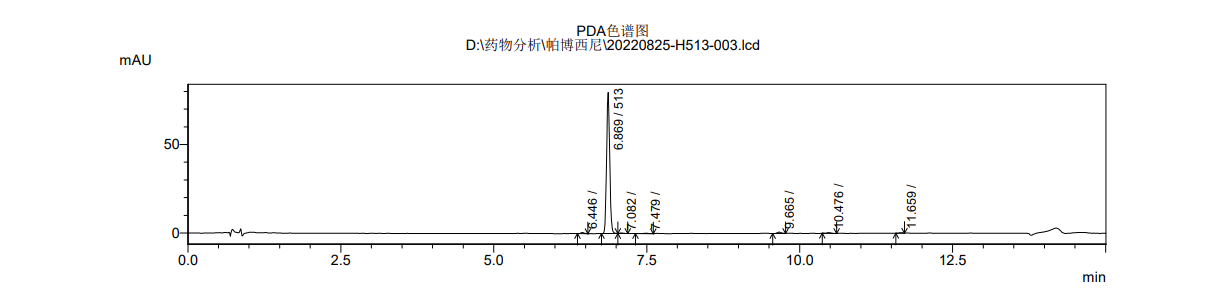

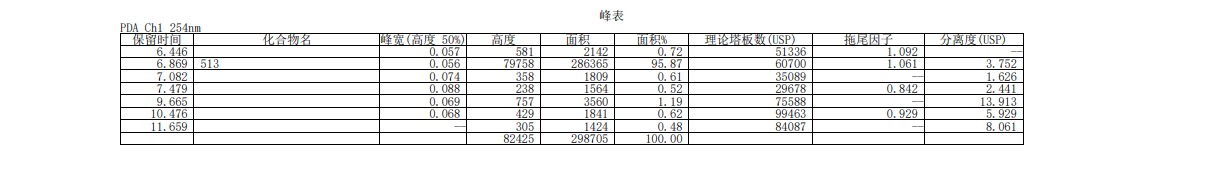
**

**HPLC purity of 5e (96.19%)**

**
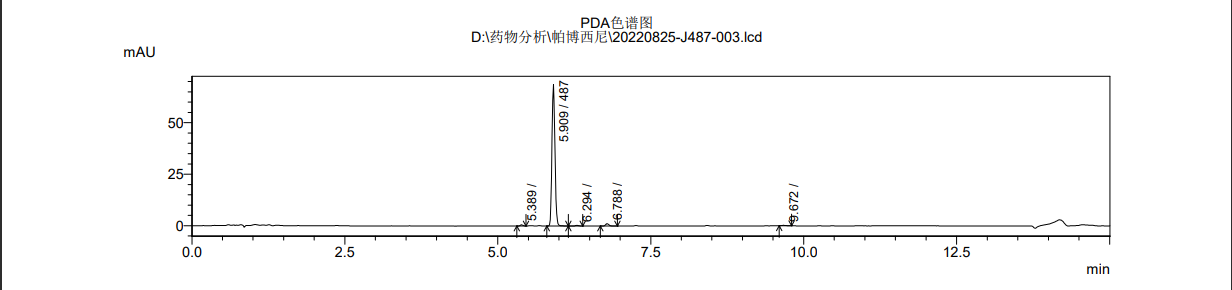

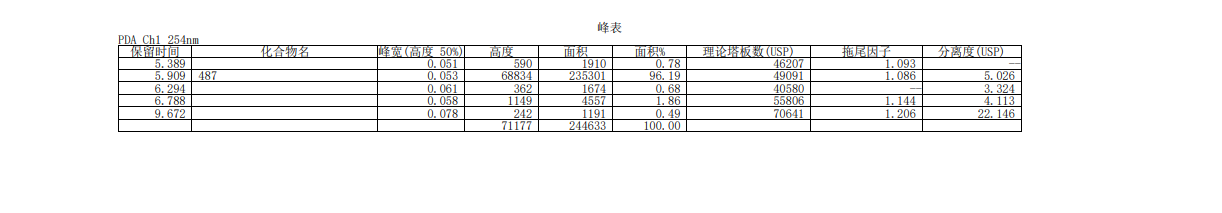
**

**HPLC purity of 5f (95.48%)**

**
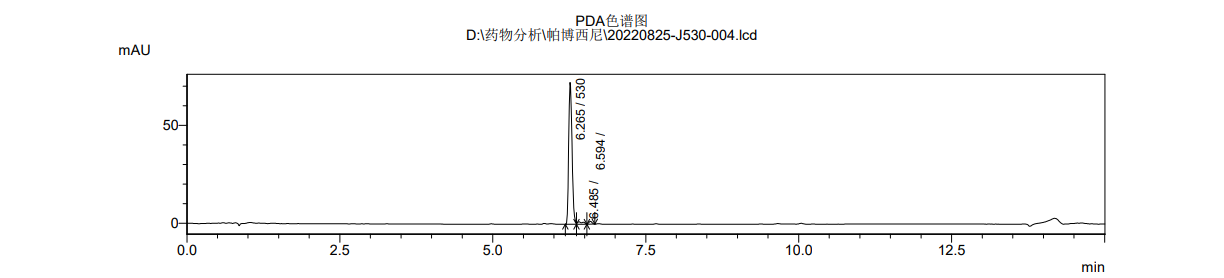
**

**
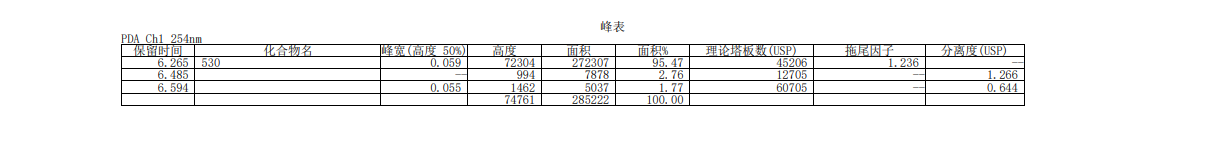
**

**HPLC purity of 5g (98.59%)**

**
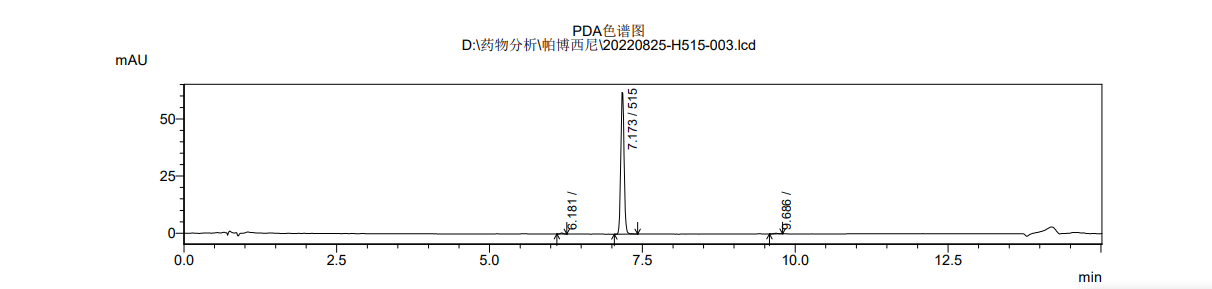

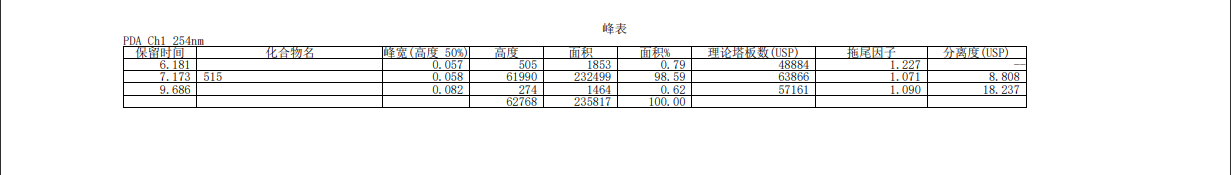
**

**HPLC purity of 5h (97.23%)**

**
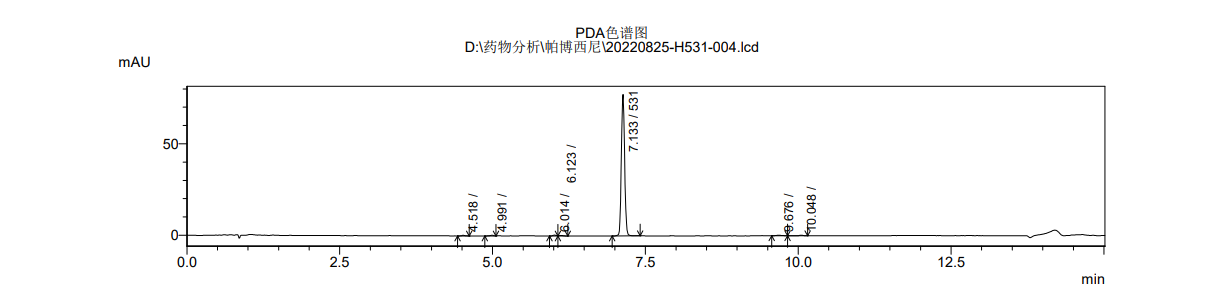

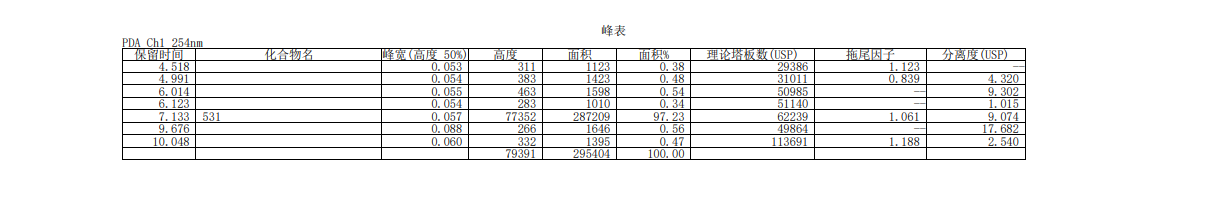
**

**HPLC purity of 17a (96.15%)**

**
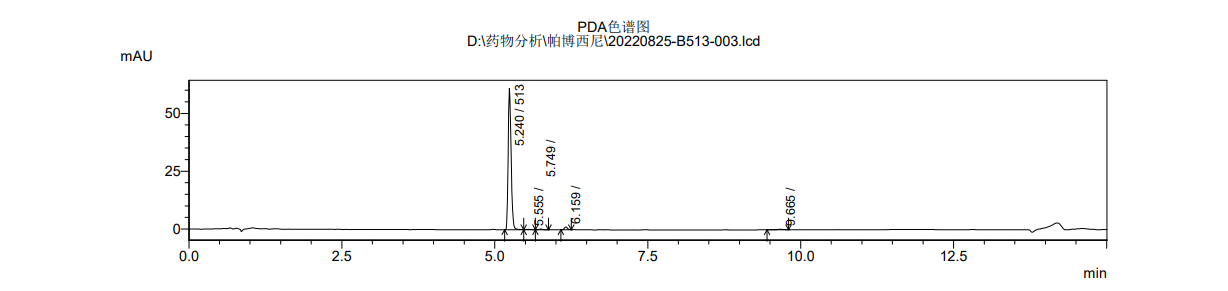

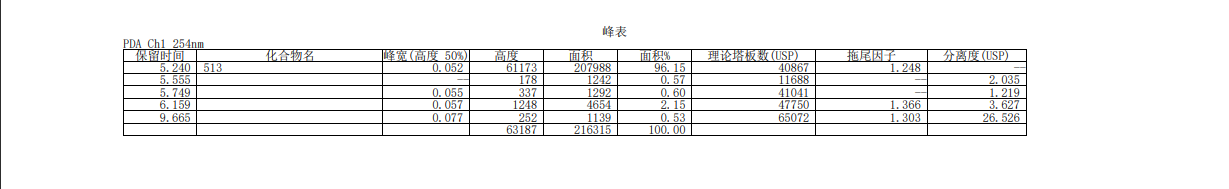
**

**HPLC purity of 17b (98.18%)**

**
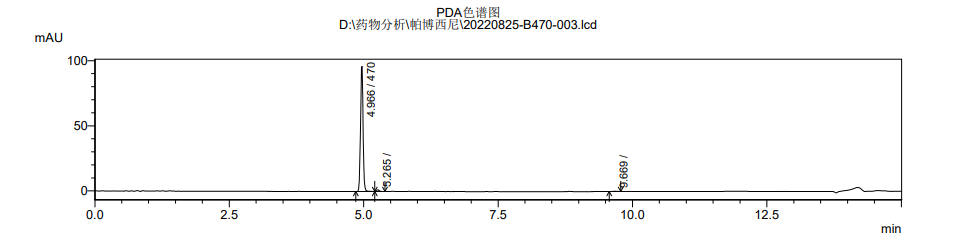

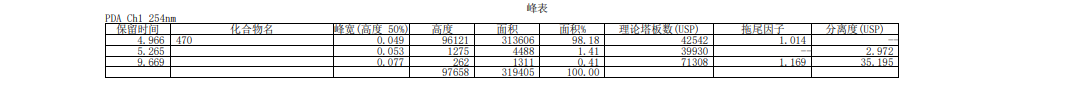
**
